# Supplementary material
Source: PubMed Central journal article supplement (PMC7484777)

## Supplemental Materials and methods

### Cloning, virus production, transfection and transduction

For the shRNA sequences and plasmids please refer to the specific section below. All shRNAs were chosen from the TRCN Broad Institute Database based on 100% homology to the target and the lowest off-target prediction (intrinsic score). shRNAs were cloned into Tet-pLKO-puro (kindly provided by Dimitri Wiederschain, Addgene plasmid #21915) and pLKO-GFP (kindly provided by Claudia Scholl, German Cancer Research Center, Heidelberg, Germany) vectors. Cloning was performed according to the Tet-pLKO-puro manual from the Addgene Website - the only modification was the use of Quick<sup>®</sup> Ligase (New England Biolabs) for 5 minutes instead of a normal T4 Ligase. Lentiviral particles were produced by co-transfection with psPAX and pMDG.2 in 293T cells using the Trans-IT LT-1<sup>®</sup> transfection reagent (Mirus). Transduction was carried out one time via spinoculation in the presence of 5 µg/mL Polybrene<sup>®</sup> (Sigma-Aldrich); non-transduced viral particles were removed after 3 hours of incubation. Cells were selected with 1 µg/mL Puromycin (Sigma-Aldrich).

### Oligonucleotides

Following qPCR primers were used:

Rad21\_forward 5'-AGCAGTGTGGAGAGCATCAT-3'

Rad21\_reverse 5'-GGCCGAAACGCCATCTTTAT-3'

Stag2\_forward 5'-TGGCTCAAACCGAATGAACG-3'

Stag2\_reverse 5'-TCTGCTGTGACGACCTCCTTT-3'

Smc1a\_forward 5'-TGCAGTGGAGTCTATTGCCA-3'

Smc1a\_reverse 5'-CTCCTTTCGTTTCAGCTGCAA-3'

Etv6\_forward 5'-TGGTTCATGCTGTCCTCACG-3'

Etv6\_reverse 5'-GAAATTCGTTTCCTGCTGTGTT-3'

Following ChIP-qPCR primers were used:

Klf1\_forward 5'-AAGGCTCAGCCCTCGTACTC-3'

Klf1\_reverse 5'-AAGTGGCCTTGGTACTGTGG-3'

Cxcr4\_forward 5'-TTCAGTCTACCTGCTGCAC-3'

Cxcr4\_reverse 5'-ACAGCAGTGGCTCTTGGACT-3'  
Epor\_forward 5'-GTCCAAAGGACCTAGCACCA-3'  
Epor\_reverse 5'-TGAGGGAGTCTGGGATATGG-3'

Following short hairpin sequences were used:

shStag2\_1 5'-ATTGCGCCAGATCCGAAATAT-3'  
shStag2\_2 5'- GCGCTTCTTGACCTTATCAAT-3'  
shStag2\_3 5'- GATAAGAATCTTCTCACATTT-3'  
shRad21\_1 5'-CGTTGGAGCCCATTGATATAA-3'  
shRad21\_2 5'- GCACCAGAAATTATGTGACTA-3'  
shRad21\_3 5'- TCGTTGGAGCCCATTGATAT-3'  
shSmc1a\_1 5'-GCAGGCATTTGAACAGATAAA-3'  
shSmc1a\_2 5'-CGACAGATTATCGGACCATTT-3'  
shEtv6\_1 5'-GCATTAAGCAGGAACGAATTT-3'  
shEtv6\_2 5'-GCGCCACTACTACAAACTAAA-3'  
shLuc1 5'-ATGTTTACTACTCGGATAT-3'  
shLuc2 5'-GAATGTTTACTACTCGGAT-3'  
shLuc3 5'-ACGCTGAGTACTTCGAAATGT-3'  
shScr 5'-CAACAAGATGAAGAGCACCAA-3'

## **Antibodies**

Following antibodies were used:

Rabbit Anti-Rad21 polyclonal Antibody, Abcam Cat# ab992, RRID:AB\_2176601  
Goat anti-SA2 polyclonal Antibody, Abcam Cat# ab196000, RRID:AB\_2716874  
Rabbit Anti-SMC1 Polyclonal Antibody, Abcam Cat# ab9262, RRID:AB\_307121  
Rabbit Anti-CTCF Polyclonal Antibody, Abcam Cat# ab70303, RRID:AB\_1209546  
Rabbit Anti-H3K27ac Polyclonal Antibody, Abcam Cat# ab4729, RRID:AB\_2118291  
Rabbit Anti-H3K4me1 Polyclonal Antibody, Abcam Cat# ab8895, RRID: AB\_306847  
Rabbit Anti-H3K4me3 Polyclonal Antibody, Diagenode Cat# c15410003, RRID:  
AB\_2616052  
Mouse Anti-RNA Polymerase II Monoclonal Antibody, Covance Cat# MMS-126R,  
RRID: AB\_10013665

Mouse anti\_TEL (E-1) Monoclonal Antibody, Santa Cruz Biotechnology Cat# sc-166835, RRID: AB\_2101020

Rabbit anti ETV6/Tel Polyclonal Antibody, Abcam Cat# ab185816, RRID: AB\_2797417

Mouse anti-beta-Actin Monoclonal Antibody, Sigma-Aldrich Cat# A2228, RRID: AB\_476697

Rabbit anti H3 Polyclonal Antibody, Abcam Cat# ab1791, RRID:AB\_302613

Rabbit anti H2AX Polyclonal Antibody, Cell Signaling Technology Cat# 2595, RRID: AB\_10694556

FITC anti-mouse CD71 Antibody, BioLegend Cat# 113806, RRID:AB\_313567

APC anti-mouse TER-119/Erythroid Cells antibody, BioLegend Cat# 116212, RRID:AB\_313713

PE anti-mouse CD117 (c-kit) Antibody, BioLegend Cat# 105808, RRID: AB\_313217

FITC Anti-mouse/human CD11b Antibody, BioLegend Cat# 101206, RRID: AB\_312789

APC anti-mouse CD14 Antibody, BioLegend Cat# 123312, RRID: AB\_940575

Briliant Violet 421 anti-mouse Ly-6A/E (Sca-1) Antibody, BioLegend Cat#108128, RRID: AB\_2563064

### **Chromatin fractionation**

Chromatin fractionation was performed following the description in<sup>1</sup>. Briefly, 50x10<sup>6</sup> cells were collected by centrifugation (8 min, 300 x g, 4°C) and lysed in 1 ml of buffer A (10 mM HEPES [pH 7.9], 10 mM KCl, 1.5 mM MgCl<sub>2</sub>, 0.34 M sucrose, 10% glycerol, freshly supplemented with 1 mM DTT, 1x Complete® (Roche) and 0,1% Triton X-100 (Millipore)) for 5 min on ice. Afterwards, nuclear pellets were collected by low-speed centrifugation (5 min, 1,300 × g, 4°C). The supernatants were further clarified by high-speed centrifugation (10 min, 16,000 x g, 4°C) and saved as cytoplasmic fractions. Nuclear pellets were washed once in buffer A and resuspended in 200 µl of buffer A supplemented with 1 mM CaCl<sub>2</sub> and 0.2 U of Micrococcal nuclease (Sigma-Aldrich). After incubation at 37°C for 1 min, the nuclease activity was stopped by addition of 1 mM EGTA. Nuclei were collected by low-speed centrifugation and lysed in 200 µl of buffer B (3 mM EDTA, 0.2 mM EGTA, freshly supplemented with 1 mM DTT and 1x Complete® (Roche)) for 30 min on ice. Insoluble chromatin fractions were collected by centrifugation (5 min, 1,700 × g, 4°C)

and supernatants were saved as soluble nuclear fractions. Insoluble chromatin was washed once in buffer B and centrifuged again under the same conditions. The resulting pellets containing chromatin were resuspended in 200  $\mu$ l 2x Laemmli buffer with 10% of  $\beta$ -mercaptoethanol. Cytoplasmic and nuclear fractions were mixed 1:1 with 4x Laemmli buffer containing 20% of  $\beta$ -mercaptoethanol.

### **Rapid immunoprecipitation mass spectrometry of endogenous proteins (RIME) for analysis of chromatin complexes**

Superparamagnetic Dynabeads Epoxy M-270<sup>®</sup> (Thermo Fisher Scientific) were precoated with antibodies over night according to the manufacturer's instruction with 2 differences: 1. Coating was performed at 30°C. 2. After the washing steps, bead-antibody conjugates were incubated in Buffer C (20 mM Tris-HCl pH 7.5, 2 mM MgCl<sub>2</sub>, 80 mM NaCl, 1% Triton X-100 and Complete<sup>®</sup> protease inhibitor).

Approximately 100 million cells were suspended in PBS and cross-linked for 8 minutes at room temperature by the addition of 1% formaldehyde, followed by quenching with 125 mM glycine for 5 minutes. Cells were washed 2x in cold PBS, shocked-frozen in liquid nitrogen and stored at -80°C. All RIME preparations were performed with previously frozen cell stocks. Cross-linked cells were thawed on ice, suspended in Lysis buffer A (20 mM Tris-HCl pH 7.5, 0.5% Triton X-100, 2 mM MgCl<sub>2</sub>, 1  $\times$  Complete<sup>®</sup> protease inhibitor), incubated for 10 minutes and homogenized with 10 passages through a 19G needle. Clearance was next performed by centrifugation at 16,000 rcf for 10 minutes at 4°C, after which the pellets were further lysed in Buffer B (20 mM Tris-HCl pH 7.5, 2 mM MgCl<sub>2</sub>, 200 mM NaCl and Complete<sup>®</sup> protease inhibitor) and incubated for 10 minutes with rotation. After decreasing the NaCl concentration to 80 mM (addition of Buffer B without NaCl), nuclei/chromatins were mechanically sheared by sonication in a Bioruptor Plus<sup>®</sup> sonicator for 10 cycles and 30 seconds with 30 seconds between the cycles. Next, lysates were cleared by centrifugation at 16,000 rcf for 10 minutes at 4°C and incubated with bead-antibody conjugates for 2h. Beads were next washed 1x with Buffer B, 10x with Buffer A and 1x with Urea solution (2M urea (Sigma-Aldrich), 20 mM Tris-HCl pH 7.5). Digestion was performed in 2 steps; step 1 for 30 minutes at 27°C and 800 rpm in Urea buffer plus 5  $\mu$ g/ml Trypsin, followed by 2 washes with Urea buffer plus 1 mM DTT and step

2 overnight at room temperature with the pooled supernatants from step1 and washes. Next day, peptides were alkylated for 30 minutes with freshly prepared, light protected Iodoacetamide (IAA, Sigma-Aldrich) solution and acidified with Trifluoroacetic acid (TFA, Sigma-Aldrich). Desalting was next performed in in-house prepared stage-tips with Solution A (0.1% TFA in H<sub>2</sub>O) and solution B (50% Acetonitrile (ACN, Sigma-Aldrich), 0.1% TFA in H<sub>2</sub>O), while elution was performed prior to the loading into a Thermo Orbitrap QExactive mass spectrometer with Dionex RSLC 3000 UPLC.

### **Co-Immunoprecipitation**

Dynabeads Protein G (Thermo Fisher Scientific, 35  $\mu$ l) were incubated with unspecific IgG, antiSA2 and antiRad21 (each with 5  $\mu$ g) antibodies for 8 hours in modified RIPA buffer (10 mM Tris-HCl pH 8.0, 1% Triton X-100, 0.1% Na-Deoxycholate, 90 mM NaCl, 1  $\times$  Complete<sup>®</sup> protease inhibitor) prior to cell lysate addition.

To prepare chromatin-enriched lysates, 50x10<sup>6</sup> cells were collected by centrifugation (8 min, 300  $\times$  g, 4°C) and lysed in 1 ml of buffer A (10 mM HEPES [pH 7.9], 10 mM KCl, 1.5 mM MgCl<sub>2</sub>, 0.34 M sucrose, 10% glycerol, freshly supplemented with 1 mM DTT, 1x Complete<sup>®</sup> (Roche) and 0,1% Triton X-100 (Millipore)) for 5 min on ice. Afterwards, nuclear pellets were collected by low-speed centrifugation (5 min, 1,300  $\times$  g, 4°C). Nuclear pellets were washed once in buffer A and resuspended in 200  $\mu$ l of buffer A supplemented with 1 mM CaCl<sub>2</sub> and 0.2 U of Micrococcal nuclease (Sigma-Aldrich). After incubation at 37°C for 1 min, the nuclease activity was stopped by addition of 1 mM EGTA. Nuclei were collected by low-speed centrifugation, washed 2x with modified RIPA buffer and finally lysed for 30' with modified RIPA (composition as described above) for 30 min on ice.

Bead-antibody conjugates were then incubated with the nuclear lysates for 4 hours, washed 4x with modified RIPA and finally boiled in 4x Laemmli Buffer freshly supplemented with DTT.

Etv6 was detected with the Mouse anti\_TEL (E-1) Monoclonal Antibody, Santa Cruz Biotechnology Cat# sc-166835, which was specifically used to avoid potential confusing 50 KDa bands that frequently occur with rabbit antibodies after Protein G-based pull downs.

## **RNA-isolation, quantitative Real Time Polymerase Chain Reaction (qRT-PCR) and sequencing**

RNA was isolated with the RNeasy Plus Mini<sup>®</sup> Kit (Qiagen) according to the manufacturer's instructions. For RT-qPCR assays, reverse transcription was performed using SuperScript III Reverse Transcriptase<sup>®</sup> (Thermo Fisher Scientific) with oligo-dT primers as per the manufacturer's protocol. Quantitative real-time PCR was performed on a Agilent Mx3000P Instrument using the Brilliant II SYBR<sup>®</sup> Green QPCR Master Mix (Agilent) or on a Thermo QuantStudio 5 Analyser (Thermo Fisher Scientific) using the Luna<sup>®</sup> Universal Probe One-Step RT-qPCR Kit (New England Biolabs).

For RNA-seq experiments, stranded polyA selected libraries were prepared using the TruSeq Stranded mRNA Library Prep Kit<sup>®</sup> from Illumina according to manufacturer's standard protocol. Libraries were subject to 150 bp paired-end sequencing on an Illumina HiSeq 4000 instrument.

## **RNAseq data analysis**

RNAseq reads were quality checked and adapter trimmed using FastQC (S. Andrews, <http://www.bioinformatics.babraham.ac.uk/projects/fastqc>). Reads were aligned to the mouse reference genome (GRCm38 primary assembly, release 82) using STAR two-pass mode (star 2.4.0.1)<sup>2</sup>. Transcript-level counts were generated with HTSeq (version 0.6.1p1)<sup>3</sup>. Gene annotation was performed with Synergizer<sup>4</sup>. Multiple mappings with the same gene annotation were summed. Normalization, transformation and differential gene expression analysis were performed using DESeq2 version 1.12.4.<sup>5</sup>. Differential expression was considered as significant with a q-value <0.05 and log<sub>2</sub>FC>0.5. Gene enrichment was calculated with GSEAPreranked<sup>6</sup> on all transcripts that were expressed in at least one condition, using "meandiv" as normalization and "weighted" as the scoring scheme. Overrepresentation analysis was performed on defined gene lists with Genomic Regions Enrichment of Annotations Tool (GREAT)<sup>7</sup> using the standard conditions. Volcano plots were performed in R, Venn diagrams with venny (Stefan Jol - *Make a Venn Diagram*. <https://www.stefanjol.nl/venny>).

### ChIP-seq data analysis

ChIP-seq reads were quality checked and adapter trimmed using FastQC. Reads were aligned to the mm10 murine reference genome using Bowtie2<sup>8</sup>. SAM files were converted into BAM format, sorted, de-duplicated and indexed with Picard- (<http://broadinstitute.github.io/picard/>) and Samtools<sup>9</sup>. Reads mapping to repetitive regions or to the mitochondrial genome were discarded. Peaks were called using Macs2<sup>10</sup>. Promoter and enhancer regions were defined by the presence of H3K4me3 and H3K4me1, respectively. To avoid multiple comparisons at the same enhancers/promoters, peaks within regions of 5 Kb (for enhancers), respectively 2.5 Kb (for promoters) were merged with Bedtools merge prior to the annotation, which was performed with HOMER<sup>11</sup>. The genomic region assignment was performed as follows: Rad21 narrow peaks were called with Macs2 independently for both Luc\_HPC replicates, accepting model building and lambda. The threshold for significance was accepted at  $p < 10^{-5}$ . Peaks from both replicates were thereafter intersected and only common events were analyzed in further steps. H3K27ac, H3K4me3, Ctf and Pol2 peaks were also called as narrow peaks, but H3K27ac and H3K4me3 were stitched together if they appeared within regions of  $< 2.5$  Kb using BedTools merge<sup>12</sup>. H3K4me1 peaks were called as broad peaks and afterwards stitched together if they were called within regions  $< 5$  Kb, again using BedTools merge. As described earlier, promoters and enhancers were defined as H3K4me3, respectively H3K4me1 positive regions. Additionally, promoters were defined active when positive for H3K27ac and Pol2 and inactive when negative for these marks. Enhancers were considered active when positive for H3K27ac and primed when negative. Insulators/Other elements were mandatory positive for Ctf and negative for all tested marks. All these assignments were performed using BedTools intersect. BigWig tracks were generated from RPM-normalized BedGraphs using the BedGraphToBigWig<sup>13</sup> script. Differential binding analysis was performed with DiffBind<sup>14</sup> by grouping replicates together. Density heatmaps and avgprofiles were computed with NGSPLOT<sup>15</sup>. All other graphs (unless otherwise specified) were performed in GraphPad Prism (version 7.0a for Mac OS X). Browser visualisation of the ChIPSeq signals was performed with the WashU Epigenome Browser<sup>16</sup>.

Erythroid differentiation and erythroid perturbation Tier assignment was performed as follows: Signal intensities at each active promoter (H3K4me3 and K3K27ac positive) with ranges of +/-5 Kb were RPM-normalized and outputted on a matrix with replicates of each condition.

Representation of the erythroid differentiation and perturbation tiers, as highlighted in Figures 2B-C and 6A was performed as follows: density heat maps of Rad21 binding sites at active promoters were split into 4 equal tiers based on the increment of the Rad21 peaks during the erythroid differentiation. Shown are examples from one replicate, although the tier assignment was always performed on 2 replicates. To avoid sequencing depth-related bias, peaks binding at active promoters and enhancers were internally calibrated using the ratio to the mean signal at insulators.

### **Promoter capture HiC analysis**

Sample pre-processing was performed with the HiCUP pipeline<sup>17</sup> using the standard settings. The resulting SAM files were converted to the BAM format and processed to the CHiCAGO pipeline<sup>18</sup> with bam2chicago.sh, which only retains the read pairs that mapped, at least at one end, to captured baits. CHiCAGO computation was performed using the standard commands/conditions. CHiCAGO design files were generated using the makeDesignFiles.py script with parameters --minFragLen=150 --maxFragLen=40000 --maxLBrownEst=1500000 --binsize=20000 --removeb2b=True --removeAdjacent=True. Browser visualisation for interactions was performed with the WashU Epigenome Browser. All interactions with at least 5 counts were considered significant. For the data integration with ChIPSeq and RNASeq, computation was performed with normalized hits of significant interactions. Initially, all significant hits per bait end were summed and factorized to the total hit count. ChIPSeq peaks or RNASeq assigned genomic positions were thereafter intersected with the bait end using Bedtools intersect -wb (where b are the pChIC bait ends)<sup>12</sup>. For the Figures 5G and S2G a normalization coefficient was calculated as follows:  $k = \text{average}(\text{average}(\text{shS2-Ery minus Luc-Ery at gained promoters}) : \text{average}(\text{shS2-Ery minus Luc-Ery at lost promoters}))$ .

### **RIME analysis**



Raw data files were analyzed using MaxQuant (1.5.6.0)<sup>19</sup>. Parent ion and MS2 spectra were searched against the SwissProt Uniprot Mus musculus protein database released in 2016 using the Andromeda search engine<sup>20</sup>. Spectra were searched with a mass tolerance of 6 ppm in MS mode, 20 ppm in HCD MS2 mode, strict trypsin specificity and allowing up to 2 miscleavages. Computation of statistics was performed using the Limma package in the R software. The assignment of cis-regulatory-region-binding proteins was performed through gene ontology molecular function enrichment (GO:MF) analysis in STRING<sup>21</sup> and further confirmed via literature search.

RIME picks up peptides from around 1000 proteins, so that discarding IgG alone as a control might not sufficiently curate the final data. Instead, several curation steps were used to identify chromatin-associated significant cohesin interactors, as follows: i) proteins recognized by less than 2 peptides in less than 2 replicates were discarded; ii) instead of IgG, 4 different shS2\_HPC replicates were used as controls for the Stag2 pull-down. The comparison was performed as LFQ intensity in Luc\_HPC vs LFQ intensity in shS2\_HPC. Most of the pulled proteins were considered false positive, because they were equally strong in both Luc\_HPC and shS2\_HPC cells. The threshold for significant association was set at  $\text{padj} < 0.1$ ,  $\text{log2FC} > 0.33$ ; iii) RIME-IP was repeated with Rad21 pull-down in 4 Luc\_HPC replicates. Again, proteins with less than 2 peptide counts in at least 2 samples were discarded; iv) the final Cohesin interactome was defined as the intersection of the list of proteins from steps ii) and iii).

### **Sanger MDS and TCGA LAML data analysis**

For the Sanger MDS dataset, genes that significantly associated with STAG2 mutations and computation codes were obtained from the previous publication<sup>22</sup>. Gene enrichment was calculated with GSEAPreranked using “meandiv” as normalization and “weighted” as the scoring scheme.

TCGA\_LAML raw HTSeq counts and TPM were obtained from the GDC data portal<sup>23</sup>. The differential expression analysis between Cohesin mutated and all other AML samples was performed with DESeq2.

### Cohesin/Etv6 gene mutation mutual exclusivity assessment

For assessment of *Stag2* and *Etv6* mutation status from the Cosmic database, curated data was downloaded and further selected for myeloid neoplasia and positive sequencing of both *Stag2* and *Etv6*.

For assessment of Cohesin member gene and *Etv6* mutation status in samples from the UK NCRI AML study group trials, DNA was sequenced using solution-based capture hybridisation and next generation sequencing using a panel of 126 genes and methodology previously described<sup>24</sup>. Combinations of mutations will be reported elsewhere.

Mutual exclusivity graphs were computed using the CBioPortal OncoPrinter<sup>25</sup>. Fisher's exact test for mutual exclusivity was confirmed independently.

### Supplemental references

1. Mendez J, Stillman B. Chromatin Association of Human Origin Recognition Complex, Cdc6, and Minichromosome Maintenance Proteins during the Cell Cycle: Assembly of Prereplication Complexes in Late Mitosis. *Mol. Cell Biol.* 2002;20(22):8602–12.
2. Dobin A, Davis CA, Schlesinger F, et al. STAR: Ultrafast universal RNA-seq aligner. *Bioinformatics.* 2013;
3. Anders S, Pyl PT, Huber W. HTSeq-A Python framework to work with high-throughput sequencing data. *Bioinformatics.* 2015;
4. Berriz GF, Roth FP. The Synergizer service for translating gene, protein and other biological identifiers. *Bioinformatics.* 2008;
5. Love MI, Anders S, Huber W. Differential analysis of count data - the DESeq2 package. 2014.
6. Subramanian A, Tamayo P, Mootha VK, et al. Gene set enrichment analysis: A knowledge-based approach for interpreting genome-wide expression profiles. *Proc. Natl. Acad. Sci.* 2005;102(43):15545–50.
7. McLean CY, Bristor D, Hiller M, et al. GREAT improves functional interpretation of cis-regulatory regions. *Nat. Biotechnol.* 2010;28(5):495–503.
8. Langmead B, Trapnell C, Pop M, Salzberg SL. Ultrafast and memory-efficient alignment of short DNA sequences to the human genome. *Genome Biol.* 2009;
9. Li H, Handsaker B, Wysoker A, et al. The Sequence Alignment/Map format and SAMtools. *Bioinformatics.* 2009;25(16):2078–9.
10. Zhang Y, Liu T, Meyer CA, et al. Model-based analysis of ChIP-Seq (MACS). *Genome Biol.* 2008;9(9):R137.
11. Heinz S, Benner C, Spann N, et al. Simple Combinations of Lineage-Determining Transcription Factors Prime cis-Regulatory Elements Required for Macrophage and B Cell Identities. *Mol. Cell.* 2010;38(4):576–

- 589.
12. Quinlan AR, Hall IM. BEDTools: A flexible suite of utilities for comparing genomic features. *Bioinformatics*. 2010;26(6):841–842.
  13. Kent WJ, Zweig AS, Barber G, Hinrichs AS, Karolchik D. BigWig and BigBed: Enabling browsing of large distributed datasets. *Bioinformatics*. 2010;26(17):2204–7.
  14. Stark R, Brown G. DiffBind : differential binding analysis of ChIP-Seq peak data. *Bioconductor*. 2011;
  15. Shen L, Shao N, Liu X, Nestler E. Ngs.plot: Quick mining and visualization of next-generation sequencing data by integrating genomic databases. *BMC Genomics*. 2014;15(284):.
  16. Zhou X, Lowdon RF, Li D, et al. Exploring long-range genome interactions using the WashU Epigenome Browser. *Nat. Methods*. 2013;10(5):.
  17. Wingett SW, Ewels P, Furlan-Magaril M, et al. HiCUP: pipeline for mapping and processing Hi-C data. *F1000Research*. 2015;4:1310.
  18. Cairns J, Freire-Pritchett P, Wingett SW, et al. CHiCAGO: Robust detection of DNA looping interactions in Capture Hi-C data. *Genome Biol*. 2016;17(1):127.
  19. Cox J, Mann M. MaxQuant enables high peptide identification rates, individualized p.p.b.-range mass accuracies and proteome-wide protein quantification. *Nat. Biotechnol*. 2008;26(12):1367–72.
  20. Cox J, Neuhauser N, Michalski A, et al. Andromeda: A peptide search engine integrated into the MaxQuant environment. *J. Proteome Res*. 2011;10(4):1794–805.
  21. Szklarczyk D, Franceschini A, Wyder S, et al. STRING v10: protein-protein interaction networks, integrated over the tree of life. *Nucleic Acids Res*. 2015;43(Database issue):D447–D452.
  22. Gerstung M, Pellagatti A, Malcovati L, et al. Combining gene mutation with gene expression data improves outcome prediction in myelodysplastic syndromes. *Nat. Commun*. 2015;6:5901.
  23. Grossman RL, Heath AP, Ferretti V, et al. Toward a Shared Vision for Cancer Genomic Data. *N. Engl. J. Med*. 2016;375(12):1109–12.
  24. Papaemmanuil E, Gerstung M, Bullinger L, et al. Genomic Classification and Prognosis in Acute Myeloid Leukemia. *N. Engl. J. Med*. 2016;374(23):2209–2221.
  25. Gao J, Aksoy BA, Dogrusoz U, et al. Integrative analysis of complex cancer genomics and clinical profiles using the cBioPortal. *Sci. Signal*. 2013;6(269):pl1.

**Table S1: Related to Figure 3 - Significant Stag2 interactors**

| Stag2 interactors | Razor + unique peptides Luc_1 | Razor + unique peptides Luc_2 | Razor + unique peptides Luc_3 | Razor + unique peptides Luc_4 | Razor + unique peptides shS2_1 | Razor + unique peptides shS2_2 | Razor + unique peptides shS2_3 | Razor + unique peptides shS2_4 | AveExpr    | P.Value     | padj        | log2FC peptides |
|-------------------|-------------------------------|-------------------------------|-------------------------------|-------------------------------|--------------------------------|--------------------------------|--------------------------------|--------------------------------|------------|-------------|-------------|-----------------|
| SMC3              | 5                             | 7                             | 4                             | 3                             | 1                              | 1                              | 0                              | 0                              | 33076212.5 | 0.030689825 | 0.086158242 | 3.247927513     |
| MCM5              | 4                             | 4                             | 2                             | 3                             | 0                              | 1                              | 1                              | 0                              | 10349950   | 0.032068859 | 0.088513716 | 2.700439718     |
| VTA1              | 2                             | 2                             | 1                             | 1                             | 0                              | 0                              | 1                              | 0                              | 8803850    | 0.004463183 | 0.033291368 | 2.584962501     |
| DUS3L             | 2                             | 2                             | 2                             | 1                             | 0                              | 1                              | 1                              | 0                              | 12306987.5 | 0.00106692  | 0.01585598  | 1.807354922     |
| MED12             | 2                             | 2                             | 2                             | 1                             | 0                              | 0                              | 1                              | 1                              | 5226662.5  | 0.02052285  | 0.072545887 | 1.807354922     |
| MCM7              | 1                             | 2                             | 2                             | 2                             | 0                              | 1                              | 1                              | 0                              | 4570360    | 0.030335836 | 0.085616258 | 1.807354922     |
| STAG2             | 12                            | 14                            | 12                            | 13                            | 4                              | 8                              | 5                              | 2                              | 419058125  | 0.003415909 | 0.028394741 | 1.424497829     |
| MLH1              | 2                             | 2                             | 2                             | 2                             | 1                              | 1                              | 0                              | 1                              | 8184550    | 0.000200353 | 0.007350865 | 1.415037499     |
| KLF13             | 2                             | 1                             | 1                             | 1                             | 0                              | 1                              | 0                              | 1                              | 5266587.5  | 0.011023808 | 0.050244338 | 1.321928095     |
| CDC73             | 2                             | 3                             | 3                             | 2                             | 0                              | 2                              | 2                              | 0                              | 11936075   | 0.014638737 | 0.058554947 | 1.321928095     |
| HIST1H2BF         | 1                             | 2                             | 1                             | 1                             | 1                              | 1                              | 0                              | 0                              | 5037500    | 0.028967216 | 0.084673402 | 1.321928095     |
| PHF2              | 2                             | 2                             | 2                             | 1                             | 1                              | 0                              | 1                              | 1                              | 16087262.5 | 0.016750425 | 0.064340982 | 1.222392421     |
| ZC3H14            | 3                             | 2                             | 3                             | 1                             | 1                              | 0                              | 2                              | 1                              | 4744437.5  | 0.016326665 | 0.063708362 | 1.169925001     |
| RUVBL1            | 3                             | 3                             | 2                             | 3                             | 2                              | 1                              | 1                              | 1                              | 35599900   | 0.005162734 | 0.035439668 | 1.137503524     |
| CTCF              | 2                             | 2                             | 2                             | 2                             | 1                              | 1                              | 1                              | 1                              | 59279075   | 0.000209586 | 0.00743332  | 1               |
| RUNX1             | 2                             | 2                             | 2                             | 2                             | 1                              | 1                              | 1                              | 1                              | 14020012.5 | 0.001686645 | 0.020411802 | 1               |
| WDHD1             | 2                             | 2                             | 2                             | 2                             | 1                              | 1                              | 1                              | 1                              | 9517686.25 | 0.001789661 | 0.020495907 | 1               |
| TOP2B             | 4                             | 4                             | 4                             | 4                             | 3                              | 2                              | 2                              | 1                              | 26537312.5 | 0.002913497 | 0.02627085  | 1               |
| NACA              | 2                             | 2                             | 2                             | 2                             | 1                              | 1                              | 1                              | 1                              | 8271612.5  | 0.007139876 | 0.043121155 | 1               |
| REXO2             | 2                             | 2                             | 2                             | 2                             | 1                              | 1                              | 1                              | 1                              | 11935712.5 | 0.012022266 | 0.053298715 | 1               |
| FKBP4             | 2                             | 3                             | 2                             | 1                             | 2                              | 1                              | 0                              | 1                              | 9707375    | 0.035977073 | 0.095938861 | 1               |
| ERG               | 2                             | 2                             | 1                             | 1                             | 0                              | 1                              | 1                              | 1                              | 6371212.5  | 0.030813029 | 0.093147419 | 1               |
| SMC1A             | 9                             | 10                            | 9                             | 10                            | 7                              | 4                              | 4                              | 5                              | 141483250  | 0.002277236 | 0.023075988 | 0.925999419     |
| GATAD2A           | 8                             | 8                             | 6                             | 8                             | 4                              | 3                              | 4                              | 5                              | 55803500   | 7.27E-05    | 0.004642967 | 0.906890596     |
| CRNKL1            | 3                             | 4                             | 3                             | 3                             | 2                              | 1                              | 2                              | 2                              | 23125200   | 0.004709434 | 0.03385701  | 0.893084796     |
| ADNP              | 2                             | 3                             | 4                             | 4                             | 1                              | 2                              | 3                              | 1                              | 16535112.5 | 0.024622597 | 0.078567258 | 0.893084796     |
| WAPAL             | 10                            | 10                            | 11                            | 11                            | 6                              | 7                              | 5                              | 5                              | 195154250  | 6.53E-06    | 0.00166624  | 0.868755467     |
| TCEA1             | 3                             | 2                             | 2                             | 2                             | 1                              | 1                              | 2                              | 1                              | 31835000   | 0.001301715 | 0.017070508 | 0.847996907     |
| RAD21             | 7                             | 6                             | 7                             | 7                             | 3                              | 4                              | 4                              | 4                              | 131786625  | 0.00358717  | 0.028914763 | 0.847996907     |
| H2AFV             | 2                             | 4                             | 1                             | 2                             | 2                              | 1                              | 1                              | 1                              | 22292975   | 0.021079806 | 0.072837462 | 0.847996907     |
| HIST1H2BK         | 2                             | 2                             | 1                             | 2                             | 1                              | 1                              | 1                              | 1                              | 27193612.5 | 7.43E-05    | 0.004642967 | 0.807354922     |
| PSIP1             | 2                             | 1                             | 2                             | 2                             | 1                              | 1                              | 1                              | 1                              | 8711050    | 8.29E-05    | 0.004642967 | 0.807354922     |
| PCNP              | 2                             | 2                             | 2                             | 1                             | 1                              | 1                              | 1                              | 1                              | 6720025    | 0.001044685 | 0.01585598  | 0.807354922     |
| PRPF6             | 2                             | 2                             | 2                             | 1                             | 1                              | 1                              | 1                              | 1                              | 19206000   | 0.004280783 | 0.032328545 | 0.807354922     |
| DDX39A            | 1                             | 2                             | 2                             | 2                             | 1                              | 1                              | 1                              | 1                              | 95135750   | 0.00479865  | 0.034038422 | 0.807354922     |
| MARS              | 2                             | 2                             | 2                             | 1                             | 1                              | 1                              | 1                              | 1                              | 20238750   | 0.009144569 | 0.047232144 | 0.807354922     |
| H2AFY             | 5                             | 4                             | 4                             | 4                             | 3                              | 2                              | 2                              | 3                              | 28640300   | 0.000167478 | 0.006784351 | 0.765534746     |
| IRF2BP2           | 5                             | 5                             | 3                             | 4                             | 4                              | 3                              | 2                              | 1                              | 38708712.5 | 0.003443455 | 0.028401834 | 0.765534746     |
| CWC15             | 1                             | 1                             | 1                             | 2                             | 1                              | 1                              | 0                              | 1                              | 10043687.5 | 0.01277503  | 0.054617697 | 0.736965594     |
| SMARCA4           | 4                             | 3                             | 2                             | 1                             | 2                              | 1                              | 2                              | 1                              | 13409187.5 | 0.024949674 | 0.078857802 | 0.736965594     |
| RCC2              | 6                             | 6                             | 5                             | 6                             | 4                              | 4                              | 3                              | 3                              | 62011250   | 0.007429335 | 0.043915625 | 0.716207034     |

|          |    |    |    |    |    |    |   |    |             |             |             |             |
|----------|----|----|----|----|----|----|---|----|-------------|-------------|-------------|-------------|
| TOP1     | 3  | 3  | 4  | 3  | 2  | 2  | 1 | 3  | 23501637.5  | 0.000367898 | 0.009787301 | 0.700439718 |
| PDS5A    | 12 | 12 | 13 | 13 | 7  | 10 | 7 | 7  | 344154125   | 2.60E-06    | 0.001385742 | 0.689659879 |
| ZC3H4    | 2  | 2  | 2  | 2  | 2  | 1  | 1 | 1  | 14864175    | 0.000567084 | 0.011603412 | 0.678071905 |
| THUMPD1  | 2  | 2  | 2  | 2  | 1  | 1  | 2 | 1  | 26067875    | 0.001226985 | 0.017070508 | 0.678071905 |
| SMAP     | 2  | 2  | 2  | 2  | 1  | 1  | 1 | 2  | 4244961.25  | 0.00717335  | 0.043121155 | 0.678071905 |
| ZC3H18   | 2  | 2  | 2  | 2  | 1  | 1  | 1 | 2  | 9217437.5   | 0.010656681 | 0.050201015 | 0.678071905 |
| TBRG1    | 2  | 3  | 3  | 3  | 2  | 2  | 1 | 2  | 22231675    | 0.006613115 | 0.040909035 | 0.652076697 |
| NARS     | 3  | 3  | 2  | 3  | 2  | 2  | 2 | 1  | 20900050    | 0.027898332 | 0.083381533 | 0.652076697 |
| SMARCE1  | 3  | 3  | 4  | 4  | 2  | 2  | 2 | 3  | 33331600    | 8.06E-05    | 0.004642967 | 0.637429921 |
| RTCB     | 4  | 4  | 3  | 3  | 3  | 2  | 2 | 2  | 26900787.5  | 0.026787027 | 0.081265833 | 0.637429921 |
| EHMT2    | 2  | 2  | 1  | 1  | 1  | 1  | 1 | 1  | 12303196.25 | 0.000438456 | 0.010637975 | 0.584962501 |
| CORO1C   | 1  | 2  | 1  | 2  | 1  | 1  | 1 | 1  | 12561375    | 0.028880621 | 0.084652841 | 0.584962501 |
| TAL1     | 4  | 4  | 4  | 4  | 3  | 3  | 1 | 4  | 64577662.5  | 0.000961487 | 0.01550033  | 0.540568381 |
| PQBP1    | 4  | 4  | 3  | 2  | 2  | 1  | 3 | 3  | 47475100    | 0.013196955 | 0.055064942 | 0.530514717 |
| SSRP1    | 3  | 2  | 2  | 3  | 3  | 1  | 1 | 2  | 12556075    | 0.010041768 | 0.049546301 | 0.514573173 |
| STAT5A   | 2  | 3  | 3  | 2  | 2  | 2  | 1 | 2  | 48829625    | 0.011007361 | 0.050244338 | 0.514573173 |
| ACLY     | 6  | 6  | 6  | 6  | 4  | 4  | 5 | 4  | 160851250   | 0.015609491 | 0.061841064 | 0.497499659 |
| GLYR1    | 2  | 1  | 2  | 2  | 2  | 1  | 1 | 1  | 10532487.5  | 0.000255393 | 0.008212543 | 0.485426827 |
| TSR1     | 2  | 2  | 2  | 1  | 1  | 1  | 2 | 1  | 21833787.5  | 0.000979937 | 0.015561983 | 0.485426827 |
| PSMD5    | 2  | 2  | 2  | 1  | 1  | 2  | 1 | 1  | 65158375    | 0.001439425 | 0.018018219 | 0.485426827 |
| YY1      | 2  | 2  | 2  | 1  | 2  | 1  | 1 | 1  | 8685682.5   | 0.010313385 | 0.049653582 | 0.485426827 |
| RBM17    | 2  | 2  | 2  | 1  | 1  | 1  | 1 | 2  | 18706512.5  | 0.017551883 | 0.065527029 | 0.485426827 |
| GALK1    | 2  | 2  | 2  | 1  | 2  | 1  | 0 | 2  | 13040662.5  | 0.020214271 | 0.072417456 | 0.485426827 |
| ETV6     | 2  | 3  | 3  | 3  | 2  | 2  | 2 | 2  | 68453625    | 0.000533036 | 0.011245478 | 0.459431619 |
| PHF6     | 3  | 3  | 2  | 3  | 2  | 2  | 2 | 2  | 38462375    | 0.000743397 | 0.013677449 | 0.459431619 |
| HMGB1    | 3  | 4  | 4  | 4  | 3  | 4  | 3 | 1  | 31331212.5  | 0.000367944 | 0.009787301 | 0.447458977 |
| MTA2     | 4  | 4  | 5  | 3  | 3  | 3  | 3 | 3  | 56785750    | 7.93E-05    | 0.004642967 | 0.415037499 |
| DPF2     | 3  | 3  | 3  | 3  | 2  | 2  | 3 | 2  | 49768875    | 0.000169787 | 0.006784351 | 0.415037499 |
| THOC1    | 2  | 2  | 2  | 2  | 2  | 2  | 1 | 1  | 32603375    | 0.001246509 | 0.017070508 | 0.415037499 |
| SUPT5H   | 3  | 3  | 3  | 3  | 2  | 1  | 3 | 3  | 14114937.5  | 0.001305194 | 0.017070508 | 0.415037499 |
| DGKZ     | 2  | 2  | 2  | 2  | 2  | 1  | 1 | 2  | 12746162.5  | 0.002160806 | 0.02256444  | 0.415037499 |
| PTMA     | 3  | 3  | 3  | 3  | 2  | 1  | 3 | 3  | 85590125    | 0.00353413  | 0.028914763 | 0.415037499 |
| MCM6     | 5  | 5  | 6  | 4  | 5  | 4  | 3 | 3  | 59008125    | 0.010117232 | 0.049546301 | 0.415037499 |
| RBM7     | 2  | 2  | 2  | 2  | 2  | 1  | 1 | 2  | 17631262.5  | 0.011107976 | 0.050244338 | 0.415037499 |
| HEATR2   | 2  | 2  | 2  | 2  | 2  | 2  | 0 | 2  | 16794500    | 0.012235661 | 0.053723155 | 0.415037499 |
| BOLA2    | 2  | 2  | 2  | 2  | 2  | 2  | 1 | 1  | 10404787.5  | 0.012527292 | 0.054136645 | 0.415037499 |
| NUP107   | 4  | 4  | 4  | 4  | 3  | 4  | 3 | 2  | 44053375    | 0.020986818 | 0.072837462 | 0.415037499 |
| FASN     | 2  | 2  | 2  | 2  | 2  | 1  | 2 | 1  | 22174625    | 0.029774041 | 0.084868459 | 0.415037499 |
| BRD4     | 3  | 3  | 3  | 3  | 3  | 3  | 2 | 1  | 20941012.5  | 0.019014944 | 0.06928733  | 0.415037499 |
| THRAP3   | 6  | 7  | 7  | 5  | 5  | 5  | 5 | 4  | 92331500    | 0.012566801 | 0.054136645 | 0.395928676 |
| PARP1    | 5  | 5  | 6  | 5  | 5  | 4  | 4 | 3  | 55219875    | 0.001433808 | 0.018018219 | 0.392317423 |
| MCM4     | 6  | 6  | 6  | 4  | 4  | 4  | 4 | 5  | 250562500   | 0.000162215 | 0.006784351 | 0.371968777 |
| HIST1H4A | 15 | 15 | 14 | 14 | 14 | 12 | 8 | 11 | 746117500   | 0.000485791 | 0.011161682 | 0.366127899 |
| MBD3     | 2  | 2  | 3  | 2  | 2  | 2  | 2 | 1  | 8877087.5   | 0.008441387 | 0.045443486 | 0.362570079 |
| ARID1A   | 2  | 2  | 2  | 3  | 1  | 2  | 2 | 2  | 12154550    | 0.014562613 | 0.058470266 | 0.362570079 |
| CAND1    | 3  | 2  | 3  | 1  | 2  | 1  | 2 | 2  | 25561375    | 0.002783009 | 0.02530873  | 0.362570079 |

---

|       |   |   |   |   |   |   |   |   |          |                 |                 |             |
|-------|---|---|---|---|---|---|---|---|----------|-----------------|-----------------|-------------|
| LASP1 | 2 | 3 | 2 | 2 | 1 | 2 | 2 | 2 | 20457300 | 0.0267689<br>97 | 0.0812658<br>33 | 0.362570079 |
| HMGB2 | 4 | 3 | 4 | 3 | 3 | 3 | 3 | 2 | 54057875 | 0.0037835<br>93 | 0.0298203<br>19 | 0.347923303 |
| EIF2A | 5 | 5 | 5 | 4 | 3 | 3 | 5 | 4 | 88363875 | 0.0384520<br>77 | 0.0998968       | 0.341036918 |

---

**Table S2: Related to Figure 3 - All Rad21 interactors**

| Rad21_interactors | Razor + unique peptides Luc_1 | Razor + unique peptides Luc_2 | Razor + unique peptides Luc_3 | Razor + unique peptides Luc_4 | Score  | LFQ intensity Luc_1 | LFQ intensity Luc_2 | LFQ intensity Luc_3 | LFQ intensity Luc_4 |
|-------------------|-------------------------------|-------------------------------|-------------------------------|-------------------------------|--------|---------------------|---------------------|---------------------|---------------------|
| HIST1H1D          | 32                            | 32                            | 33                            | 31                            | 323.31 | 3866500000          | 4111900000          | 9103700000          | 4351800000          |
| HIST1H1A          | 15                            | 14                            | 13                            | 13                            | 323.31 | 1070400000          | 1124400000          | 2618200000          | 1155500000          |
| HIST1H1B          | 17                            | 18                            | 18                            | 17                            | 197.93 | 1029800000          | 850690000           | 2333900000          | 1019000000          |
| GAPDH             | 22                            | 23                            | 21                            | 23                            | 206.14 | 920350000           | 852430000           | 682170000           | 833030000           |
| HIST1H2BF         | 20                            | 23                            | 21                            | 25                            | 323.31 | 731800000           | 909390000           | 738580000           | 893610000           |
| HNRNPA2B1         | 21                            | 24                            | 23                            | 21                            | 323.31 | 788410000           | 828620000           | 876860000           | 747610000           |
| NCL               | 38                            | 47                            | 44                            | 52                            | 323.31 | 632240000           | 716000000           | 997460000           | 671230000           |
| HNRNPA3           | 7                             | 9                             | 8                             | 9                             | 138.42 | 612450000           | 567870000           | 1066500000          | 674150000           |
| H3F3A             | 11                            | 13                            | 12                            | 12                            | 118.8  | 623950000           | 701290000           | 742090000           | 663400000           |
| HIST1H1E          | 8                             | 8                             | 8                             | 8                             | 55.45  | 545770000           | 467910000           | 1099900000          | 551460000           |
| HNRNPU            | 24                            | 25                            | 25                            | 27                            | 311.61 | 580700000           | 592190000           | 662960000           | 643020000           |
| VIM               | 23                            | 26                            | 22                            | 24                            | 267.3  | 655730000           | 529780000           | 616840000           | 525120000           |
| GM2000            | 12                            | 12                            | 11                            | 11                            | 151.35 | 414980000           | 464460000           | 699500000           | 486490000           |
| HNRNPA1           | 6                             | 7                             | 7                             | 7                             | 122.29 | 423340000           | 428260000           | 621490000           | 443180000           |
| EEF1A1            | 19                            | 20                            | 20                            | 21                            | 204.02 | 385640000           | 508280000           | 445120000           | 505800000           |
| HIST1H1C          | 11                            | 10                            | 9                             | 11                            | 140.06 | 309630000           | 349820000           | 701020000           | 334420000           |
| SMC1A             | 37                            | 42                            | 30                            | 45                            | 301.26 | 525700000           | 473060000           | 218200000           | 431380000           |
| RAD21             | 15                            | 17                            | 15                            | 18                            | 187.05 | 416260000           | 480720000           | 175740000           | 530210000           |
| TUBA1B            | 8                             | 8                             | 6                             | 10                            | 133.55 | 351280000           | 475460000           | 254220000           | 505010000           |
| PPIA              | 14                            | 15                            | 13                            | 15                            | 101.75 | 337620000           | 435480000           | 327030000           | 405900000           |
| HIST1H4A          | 11                            | 15                            | 15                            | 14                            | 152.67 | 306570000           | 353080000           | 290840000           | 386460000           |
| H2AFX             | 6                             | 6                             | 6                             | 6                             | 25.256 | 298140000           | 202780000           | 457660000           | 196270000           |
| ACTB              | 16                            | 14                            | 15                            | 14                            | 162.4  | 282910000           | 308550000           | 208050000           | 254620000           |
| HIST1H2AF         | 11                            | 10                            | 10                            | 11                            | 65.847 | 234370000           | 268700000           | 242140000           | 242020000           |
| PDS5A             | 22                            | 22                            | 18                            | 24                            | 157.52 | 259740000           | 244220000           | 154310000           | 229640000           |
| TKT               | 16                            | 20                            | 18                            | 20                            | 113.39 | 230440000           | 231830000           | 169400000           | 223410000           |
| NPM1              | 12                            | 12                            | 13                            | 12                            | 100.4  | 183720000           | 202800000           | 256510000           | 206250000           |
| HMGA2             | 5                             | 5                             | 6                             | 5                             | 76.512 | 183240000           | 180800000           | 319880000           | 159400000           |
| TUBB5             | 13                            | 13                            | 11                            | 13                            | 84.44  | 225870000           | 218920000           | 116200000           | 225580000           |
| HNRNPC            | 15                            | 16                            | 13                            | 16                            | 90.736 | 166230000           | 198730000           | 187750000           | 214320000           |
| HNRNPK            | 17                            | 17                            | 14                            | 18                            | 110.08 | 196260000           | 195460000           | 171650000           | 196550000           |
| PDS5B             | 20                            | 21                            | 15                            | 23                            | 135.64 | 196650000           | 203000000           | 118900000           | 206440000           |
| ALYREF            | 10                            | 9                             | 10                            | 10                            | 319.69 | 132370000           | 141560000           | 280400000           | 166000000           |
| CBX3              | 4                             | 5                             | 4                             | 5                             | 80.194 | 193210000           | 167650000           | 195850000           | 154390000           |
| SERBP1            | 11                            | 11                            | 9                             | 11                            | 144.65 | 197750000           | 159980000           | 169660000           | 149640000           |
| LMNB1             | 10                            | 9                             | 11                            | 10                            | 79.301 | 132900000           | 135220000           | 263660000           | 133530000           |
| PKM               | 19                            | 19                            | 19                            | 21                            | 158.77 | 142670000           | 165140000           | 126940000           | 206930000           |
| SMC3              | 28                            | 29                            | 22                            | 27                            | 210.18 | 179270000           | 203050000           | 825070000           | 167370000           |
| KHSRP             | 16                            | 18                            | 16                            | 18                            | 168.8  | 144560000           | 131690000           | 118360000           | 154250000           |
| EIF4A3            | 5                             | 7                             | 5                             | 6                             | 59.995 | 119560000           | 127000000           | 172480000           | 118550000           |
| G3BP1             | 12                            | 15                            | 10                            | 14                            | 73.394 | 143490000           | 133580000           | 889860000           | 141580000           |

|          |    |    |    |    |        |           |           |           |           |
|----------|----|----|----|----|--------|-----------|-----------|-----------|-----------|
| HNRNPA0  | 8  | 9  | 7  | 8  | 49.785 | 120980000 | 123940000 | 142450000 | 119280000 |
| TRIM28   | 11 | 13 | 7  | 11 | 150.07 | 129740000 | 108700000 | 102490000 | 113120000 |
| GM10282  | 5  | 5  | 5  | 5  | 68.492 | 92123000  | 79963000  | 175970000 | 77470000  |
| HNRNPF   | 10 | 9  | 9  | 10 | 52.497 | 86822000  | 104930000 | 111510000 | 113770000 |
| TAGLN2   | 5  | 5  | 5  | 5  | 35.267 | 117640000 | 91530000  | 101490000 | 91792000  |
| HSP90AB1 | 19 | 20 | 19 | 21 | 165.5  | 98628000  | 111130000 | 68822000  | 114840000 |
| SRRM2    | 15 | 14 | 15 | 15 | 151.79 | 88589000  | 68161000  | 109260000 | 77299000  |
| DDX39B   | 6  | 10 | 7  | 9  | 75.026 | 87127000  | 80340000  | 92653000  | 76480000  |
| HSPA8    | 16 | 18 | 18 | 22 | 95.796 | 79122000  | 86904000  | 53397000  | 87996000  |
| EEF2     | 11 | 12 | 11 | 10 | 43.514 | 79420000  | 83949000  | 54530000  | 88377000  |
| NPM3     | 2  | 3  | 2  | 3  | 134.86 | 100820000 | 56400000  | 42552000  | 92378000  |
| PA2G4    | 10 | 11 | 9  | 10 | 63.744 | 78779000  | 71929000  | 78499000  | 61598000  |
| YBX1     | 8  | 8  | 7  | 8  | 78.406 | 92559000  | 72394000  | 58653000  | 65280000  |
| DDX21    | 12 | 16 | 17 | 15 | 113.44 | 70664000  | 53940000  | 98856000  | 64708000  |
| HNRNPAB  | 11 | 10 | 9  | 10 | 61.549 | 72556000  | 71324000  | 50958000  | 77137000  |
| MCM3     | 10 | 11 | 8  | 11 | 90.095 | 75432000  | 76942000  | 42488000  | 75822000  |
| MCM2     | 6  | 9  | 6  | 8  | 46.459 | 63008000  | 46204000  | 106410000 | 54544000  |
| ANP32B   | 6  | 8  | 8  | 8  | 39.458 | 84088000  | 59388000  | 60360000  | 61549000  |
| PARP1    | 14 | 12 | 11 | 16 | 82.252 | 71414000  | 72332000  | 51789000  | 69661000  |
| STMN1    | 6  | 6  | 5  | 5  | 83.719 | 64274000  | 61827000  | 69583000  | 66962000  |
| MCM4     | 9  | 7  | 6  | 11 | 51.811 | 69096000  | 66749000  | 56084000  | 69816000  |
| NONO     | 10 | 10 | 9  | 11 | 67.147 | 59028000  | 59632000  | 83883000  | 57170000  |
| GM6563   | 8  | 7  | 8  | 7  | 34.032 | 64884000  | 57098000  | 78336000  | 57352000  |
| SRSF5    | 8  | 7  | 9  | 7  | 34.442 | 46471000  | 64222000  | 79767000  | 64303000  |
| STAG2    | 12 | 13 | 13 | 13 | 99.536 | 83807000  | 71604000  | 25401000  | 73106000  |
| TPM3     | 4  | 3  | 4  | 4  | 44.505 | 78822000  | 57077000  | 53515000  | 62768000  |
| ENO1     | 9  | 8  | 10 | 11 | 49.549 | 48402000  | 60370000  | 67909000  | 74068000  |
| H2AFY    | 7  | 9  | 6  | 8  | 78.352 | 54172000  | 50744000  | 84755000  | 50136000  |
| WAPAL    | 10 | 9  | 7  | 10 | 75.009 | 68135000  | 66027000  | 37747000  | 63625000  |
| AHCY     | 6  | 6  | 4  | 6  | 41.001 | 60440000  | 53064000  | 51406000  | 66905000  |
| RAN      | 7  | 7  | 6  | 7  | 26.881 | 48900000  | 53510000  | 56101000  | 65470000  |
| CHTOP    | 6  | 7  | 8  | 7  | 61.206 | 49225000  | 43632000  | 85741000  | 41040000  |
| HINT1    | 3  | 4  | 3  | 3  | 41.501 | 66786000  | 45830000  | 61282000  | 45403000  |
| GNB2L1   | 8  | 8  | 7  | 9  | 46.418 | 62774000  | 58814000  | 36050000  | 51277000  |
| CAPRN1   | 6  | 6  | 6  | 6  | 21.129 | 56151000  | 58660000  | 37074000  | 56773000  |
| MCM6     | 8  | 7  | 6  | 8  | 44.67  | 51852000  | 57673000  | 42572000  | 56344000  |
| LGALS9   | 5  | 6  | 4  | 6  | 89.933 | 65498000  | 55500000  | 31128000  | 48820000  |
| UHRF1    | 9  | 9  | 7  | 9  | 72.417 | 47312000  | 49738000  | 42969000  | 59932000  |
| SFPQ     | 11 | 10 | 11 | 11 | 45.723 | 45348000  | 55157000  | 43464000  | 52543000  |
| ALDOA    | 7  | 7  | 4  | 7  | 61.958 | 58353000  | 49288000  | 34290000  | 53447000  |
| PGK1     | 6  | 9  | 8  | 8  | 45.738 | 45509000  | 51684000  | 38729000  | 57644000  |
| FBL      | 5  | 7  | 5  | 7  | 23.635 | 39439000  | 40764000  | 62235000  | 39106000  |
| EIF4H    | 4  | 4  | 5  | 5  | 120.94 | 45942000  | 40439000  | 45966000  | 45292000  |
| PAICS    | 5  | 4  | 3  | 4  | 34.901 | 56606000  | 38501000  | 40630000  | 40930000  |
| HMGA1    | 6  | 5  | 6  | 7  | 60.136 | 38634000  | 31849000  | 75309000  | 29668000  |
| RCC2     | 7  | 7  | 7  | 8  | 37.234 | 34888000  | 44920000  | 37839000  | 54075000  |



|         |   |    |   |   |        |          |          |          |          |
|---------|---|----|---|---|--------|----------|----------|----------|----------|
| SRSF6   | 5 | 7  | 7 | 7 | 40.1   | 50027000 | 39171000 | 51634000 | 30874000 |
| CPSF6   | 6 | 6  | 4 | 6 | 116.06 | 49948000 | 41053000 | 36696000 | 42003000 |
| HMGB1   | 7 | 7  | 7 | 7 | 17.271 | 43542000 | 42133000 | 34233000 | 46544000 |
| PABPN1  | 5 | 5  | 5 | 4 | 83.257 | 43965000 | 33038000 | 53320000 | 35333000 |
| PHGDH   | 8 | 9  | 7 | 8 | 39.261 | 42038000 | 41115000 | 29111000 | 41488000 |
| DDX17   | 4 | 5  | 5 | 4 | 110.15 | 35433000 | 37926000 | 32481000 | 46105000 |
| SNW1    | 8 | 7  | 7 | 7 | 60.527 | 43342000 | 37357000 | 37821000 | 32491000 |
| CCT4    | 5 | 5  | 6 | 6 | 16.675 | 40423000 | 39889000 | 36468000 | 33777000 |
| TRA2B   | 3 | 5  | 5 | 4 | 16.622 | 32807000 | 24355000 | 59255000 | 25968000 |
| NIFK    | 3 | 4  | 5 | 4 | 52.266 | 31395000 | 24597000 | 52926000 | 30010000 |
| HNRNPL  | 8 | 10 | 9 | 8 | 37.849 | 36646000 | 40337000 | 26527000 | 31774000 |
| LUC7L2  | 6 | 5  | 4 | 5 | 19.9   | 30173000 | 31638000 | 34553000 | 35150000 |
| SSB     | 6 | 5  | 5 | 5 | 21.932 | 22681000 | 36034000 | 35662000 | 36961000 |
| PRPF19  | 5 | 6  | 5 | 6 | 64.497 | 36016000 | 36011000 | 19877000 | 31367000 |
| DDX3X   | 7 | 6  | 7 | 6 | 76.695 | 35201000 | 28041000 | 28063000 | 30029000 |
| SP16H   | 5 | 6  | 3 | 5 | 30.483 | 28336000 | 28349000 | 36195000 | 27280000 |
| CHD4    | 6 | 6  | 5 | 5 | 18.44  | 33801000 | 26062000 | 35657000 | 23799000 |
| CLIC1   | 5 | 7  | 5 | 7 | 34.582 | 36717000 | 24597000 | 19300000 | 38665000 |
| TARDBP  | 4 | 4  | 4 | 4 | 65.303 | 34037000 | 30318000 | 23066000 | 27344000 |
| EIF1AX  | 4 | 4  | 4 | 4 | 29.958 | 20380000 | 28334000 | 26871000 | 38322000 |
| MATR3   | 4 | 3  | 2 | 3 | 50.922 | 28468000 | 26413000 | 30750000 | 27623000 |
| MYBBP1A | 7 | 6  | 7 | 6 | 40.459 | 20696000 | 21721000 | 48376000 | 21003000 |
| STAG1   | 8 | 10 | 4 | 9 | 40.7   | 32647000 | 30123000 | 13874000 | 31998000 |
| CTCF    | 5 | 5  | 5 | 4 | 31.882 | 34488000 | 33182000 | 14583000 | 26384000 |
| ANP32A  | 2 | 4  | 2 | 3 | 28.269 | 23735000 | 26474000 | 24771000 | 33093000 |
| VARS    | 5 | 5  | 5 | 6 | 43.192 | 27958000 | 25806000 | 21855000 | 30639000 |
| ARPC4   | 3 | 3  | 2 | 3 | 19.376 | 21645000 | 24406000 | 26404000 | 33641000 |
| HMGB2   | 6 | 6  | 6 | 6 | 19.615 | 35856000 | 25453000 | 20809000 | 20562000 |
| PCBP1   | 5 | 5  | 3 | 5 | 27.62  | 37233000 | 21966000 | 16190000 | 25564000 |
| SMARCC1 | 5 | 4  | 2 | 4 | 53.604 | 28732000 | 23444000 | 23147000 | 23842000 |
| PHB     | 4 | 3  | 3 | 5 | 19.933 | 27701000 | 19699000 | 24433000 | 24787000 |
| MCM7    | 6 | 7  | 6 | 7 | 31.263 | 25453000 | 25387000 | 21467000 | 24261000 |
| CCT2    | 5 | 3  | 4 | 5 | 79.977 | 24898000 | 23824000 | 14583000 | 32776000 |
| TOP1    | 7 | 6  | 7 | 7 | 24.851 | 24910000 | 20512000 | 22553000 | 26890000 |
| IGF2BP3 | 9 | 9  | 8 | 8 | 39.225 | 28300000 | 26667000 | 19365000 | 20093000 |
| HP1BP3  | 8 | 8  | 9 | 7 | 33.907 | 23117000 | 18215000 | 27492000 | 24196000 |
| SART3   | 2 | 3  | 2 | 3 | 23.934 | 25300000 | 18151000 | 30858000 | 18267000 |
| TUBB4B  | 3 | 3  | 3 | 2 | 16.152 | 31188000 | 24112000 | 13652000 | 21785000 |
| HDAC1   | 3 | 3  | 2 | 4 | 4.9755 | 22154000 | 26334000 | 16959000 | 24157000 |
| PABPC1  | 8 | 7  | 5 | 6 | 28.926 | 25841000 | 29443000 | 14431000 | 19430000 |
| EIF5A   | 2 | 5  | 3 | 4 | 24.062 | 24745000 | 24950000 | 17896000 | 21129000 |
| RBMXL1  | 5 | 6  | 6 | 6 | 23.692 | 22683000 | 18208000 | 25451000 | 20344000 |
| SRRT    | 4 | 4  | 3 | 4 | 8.7794 | 19723000 | 20200000 | 26305000 | 20339000 |
| DPYSL2  | 7 | 7  | 5 | 6 | 20.193 | 24642000 | 19930000 | 21279000 | 19217000 |
| HDLBP   | 4 | 3  | 2 | 3 | 109.04 | 21572000 | 17287000 | 22925000 | 22144000 |
| XRN2    | 4 | 5  | 4 | 5 | 47.518 | 22004000 | 18860000 | 21434000 | 19113000 |

|         |   |   |   |   |        |          |          |          |          |
|---------|---|---|---|---|--------|----------|----------|----------|----------|
| H1F0    | 5 | 6 | 5 | 5 | 30.311 | 14613000 | 10981000 | 33782000 | 21642000 |
| SNRPA1  | 2 | 2 | 2 | 2 | 28.135 | 21045000 | 14437000 | 28545000 | 16179000 |
| EIF4A1  | 4 | 6 | 6 | 4 | 31.81  | 26530000 | 18528000 | 14388000 | 20368000 |
| IKZF1   | 6 | 6 | 4 | 5 | 38.259 | 18308000 | 22579000 | 15223000 | 23700000 |
| MYH9    | 5 | 5 | 5 | 6 | 44.513 | 26213000 | 19000000 | 14019000 | 19170000 |
| MTDH    | 1 | 2 | 1 | 2 | 15.101 | 15606000 | 15382000 | 31377000 | 15596000 |
| SND1    | 7 | 7 | 8 | 7 | 35.682 | 20407000 | 19818000 | 16162000 | 19965000 |
| ILF3    | 3 | 2 | 2 | 2 | 9.7258 | 20738000 | 17041000 | 24985000 | 12978000 |
| RFC5    | 2 | 2 | 2 | 2 | 12.071 | 16936000 | 14732000 | 29405000 | 14655000 |
| PDCD11  | 4 | 4 | 5 | 4 | 25.014 | 15691000 | 10834000 | 34161000 | 15022000 |
| ACLY    | 4 | 4 | 4 | 4 | 17.506 | 21408000 | 19457000 | 13448000 | 20142000 |
| VCP     | 2 | 1 | 2 | 3 | 70.19  | 20892000 | 16110000 | 17334000 | 19807000 |
| RBM14   | 5 | 6 | 4 | 4 | 21.968 | 22305000 | 17339000 | 18204000 | 15559000 |
| SNRPA   | 3 | 3 | 4 | 3 | 33.968 | 24781000 | 15301000 | 14571000 | 17737000 |
| POLDIP3 | 5 | 7 | 6 | 6 | 45.336 | 14205000 | 12538000 | 29067000 | 16133000 |
| TMPO    | 7 | 9 | 9 | 8 | 62.865 | 18737000 | 15414000 | 19120000 | 17894000 |
| PFKL    | 1 | 2 | 2 | 2 | 29.569 | 0        | 23036000 | 24790000 | 23076000 |
| TPI1    | 4 | 3 | 2 | 3 | 23.969 | 18695000 | 17953000 | 17061000 | 15483000 |
| COTL1   | 3 | 3 | 3 | 3 | 9.695  | 20698000 | 15550000 | 15922000 | 15296000 |
| CDV3    | 3 | 4 | 3 | 5 | 41.003 | 17941000 | 17193000 | 19474000 | 12634000 |
| GTF2I   | 4 | 3 | 2 | 3 | 7.1233 | 22447000 | 17780000 | 13764000 | 12716000 |
| TOP2B   | 5 | 6 | 6 | 5 | 19.272 | 15097000 | 15678000 | 18584000 | 16686000 |
| NUDT21  | 3 | 3 | 2 | 2 | 16.541 | 17458000 | 20486000 | 13712000 | 13849000 |
| ANXA1   | 3 | 3 | 3 | 3 | 89.421 | 18407000 | 15091000 | 13296000 | 18536000 |
| MSN     | 7 | 7 | 6 | 8 | 29.616 | 16573000 | 19969000 | 11692000 | 16345000 |
| HNRNP1  | 6 | 8 | 6 | 8 | 47.683 | 18248000 | 13759000 | 14705000 | 17561000 |
| LIMD2   | 2 | 3 | 2 | 3 | 63.371 | 18683000 | 14986000 | 15087000 | 14582000 |
| TOP2A   | 6 | 5 | 4 | 6 | 31.848 | 9441000  | 14258000 | 23388000 | 15806000 |
| MTA2    | 4 | 6 | 4 | 4 | 45.859 | 14663000 | 14565000 | 17093000 | 15690000 |
| MCM5    | 9 | 7 | 6 | 6 | 24.037 | 16867000 | 20041000 | 9641600  | 14860000 |
| RUVBL2  | 4 | 4 | 4 | 4 | 45.731 | 21112000 | 15097000 | 10675000 | 14421000 |
| KHDRBS1 | 3 | 5 | 5 | 5 | 11.146 | 14584000 | 14518000 | 22466000 | 9647000  |
| DDX18   | 4 | 5 | 4 | 5 | 21.8   | 15658000 | 10413000 | 23567000 | 10765000 |
| MPO     | 5 | 7 | 5 | 6 | 18.845 | 17847000 | 14718000 | 10315000 | 17398000 |
| SF1     | 5 | 7 | 3 | 6 | 18.107 | 17965000 | 14201000 | 12085000 | 15911000 |
| HSPA9   | 4 | 4 | 4 | 4 | 11.233 | 17324000 | 15149000 | 11539000 | 16133000 |
| PRDX1   | 4 | 5 | 3 | 5 | 21.447 | 14545000 | 16918000 | 11806000 | 15714000 |
| FMR1    | 4 | 4 | 4 | 3 | 27.553 | 16125000 | 15201000 | 10729000 | 16913000 |
| NOP56   | 2 | 3 | 4 | 3 | 27.134 | 12515000 | 12304000 | 18985000 | 14151000 |
| ACTG1   | 2 | 2 | 2 | 2 | 34.633 | 14713000 | 14623000 | 12927000 | 15144000 |
| SRSF3   | 3 | 3 | 2 | 2 | 19.005 | 10642000 | 14185000 | 20021000 | 12410000 |
| QK      | 4 | 5 | 4 | 5 | 14.56  | 14048000 | 12583000 | 16326000 | 13677000 |
| ETV6    | 2 | 4 | 2 | 3 | 40.249 | 15140000 | 14432000 | 14246000 | 11662000 |
| PHF6    | 2 | 3 | 3 | 3 | 24.133 | 10337000 | 10411000 | 21618000 | 12729000 |
| EIF4B   | 3 | 3 | 3 | 4 | 12.113 | 13077000 | 10286000 | 18697000 | 12689000 |
| KDM2A   | 2 | 3 | 3 | 3 | 5.4058 | 0        | 53515000 | 0        | 0        |

|         |   |   |   |   |        |          |          |          |          |
|---------|---|---|---|---|--------|----------|----------|----------|----------|
| NOP58   | 4 | 5 | 3 | 4 | 20.842 | 10717000 | 10123000 | 20017000 | 12145000 |
| ELF1    | 3 | 2 | 3 | 3 | 8.8864 | 12710000 | 10780000 | 17210000 | 11191000 |
| UBAP2   | 5 | 5 | 5 | 5 | 14.514 | 14301000 | 13047000 | 12992000 | 11224000 |
| CORO7   | 5 | 6 | 5 | 6 | 20.059 | 15383000 | 12767000 | 13237000 | 10141000 |
| TLN1    | 3 | 4 | 3 | 4 | 10.471 | 13634000 | 12808000 | 11582000 | 13113000 |
| GATAD2A | 7 | 8 | 7 | 7 | 26.321 | 15964000 | 11144000 | 11895000 | 12067000 |
| CSTF2   | 3 | 3 | 3 | 3 | 22.513 | 11566000 | 10489000 | 16035000 | 12952000 |
| BTF3    | 4 | 4 | 4 | 5 | 12.057 | 14181000 | 13618000 | 12363000 | 10360000 |
| U2AF2   | 2 | 3 | 2 | 2 | 21.86  | 13017000 | 10542000 | 15303000 | 11650000 |
| UBA1    | 3 | 4 | 4 | 3 | 39.757 | 13270000 | 14550000 | 8497000  | 13717000 |
| DOCK11  | 6 | 5 | 5 | 9 | 24.43  | 15435000 | 12956000 | 8774400  | 12740000 |
| PHB2    | 4 | 6 | 3 | 5 | 18.562 | 14208000 | 11975000 | 9622700  | 13757000 |
| PRPF8   | 2 | 2 | 2 | 2 | 13.682 | 17053000 | 11139000 | 11111000 | 10212000 |
| GTPBP4  | 6 | 4 | 7 | 6 | 23.211 | 7645300  | 8598900  | 23989000 | 9122200  |
| CDC5L   | 4 | 5 | 4 | 5 | 15.305 | 12265000 | 11457000 | 11812000 | 12973000 |
| RUVBL1  | 4 | 4 | 4 | 4 | 7.985  | 12007000 | 12122000 | 9919400  | 14184000 |
| CASP3   | 1 | 2 | 2 | 2 | 15.213 | 0        | 15236000 | 18509000 | 14457000 |
| HNRNPA3 | 1 | 2 | 2 | 2 | 4.6612 | 0        | 18646000 | 20371000 | 8606400  |
| HSPD1   | 2 | 2 | 3 | 3 | 36.151 | 0        | 0        | 13540000 | 33430000 |
| ADSS    | 2 | 3 | 3 | 3 | 24.832 | 14176000 | 10782000 | 9585600  | 11831000 |
| CCT8    | 4 | 5 | 2 | 4 | 15.394 | 14695000 | 13249000 | 7812600  | 9773700  |
| CSRP1   | 2 | 1 | 2 | 2 | 16.887 | 11172000 | 0        | 13488000 | 20637000 |
| WBP11   | 3 | 3 | 3 | 3 | 8.5752 | 12576000 | 9731800  | 14796000 | 7997500  |
| GM9833  | 3 | 3 | 5 | 4 | 10.487 | 10292000 | 9715900  | 13935000 | 10749000 |
| THRAP3  | 4 | 4 | 4 | 5 | 17.391 | 9792300  | 9686800  | 11234000 | 13656000 |
| PHF2    | 3 | 2 | 3 | 3 | 15.687 | 13093000 | 10400000 | 8138700  | 12175000 |
| AKR1B3  | 2 | 2 | 2 | 2 | 12.502 | 11304000 | 10714000 | 10018000 | 11445000 |
| YTHDC1  | 3 | 3 | 3 | 3 | 28.389 | 7818400  | 8297700  | 16990000 | 10178000 |
| TRMT112 | 2 | 2 | 2 | 2 | 6.2332 | 13129000 | 9186900  | 11388000 | 9012600  |
| LDHA    | 1 | 2 | 2 | 2 | 17.349 | 9699700  | 14441000 | 8180200  | 10292000 |
| LYAR    | 4 | 5 | 5 | 5 | 13.258 | 7857000  | 7232900  | 17280000 | 9748000  |
| LBR     | 4 | 2 | 3 | 3 | 11.694 | 6807800  | 10896000 | 13470000 | 10690000 |
| GCLM    | 2 | 2 | 2 | 2 | 11.299 | 12530000 | 9408900  | 9986400  | 9413900  |
| TCP1    | 7 | 8 | 4 | 6 | 29.082 | 13128000 | 9945300  | 7490200  | 10335000 |
| LGALS1  | 2 | 2 | 2 | 2 | 12.43  | 10378000 | 13773000 | 7349300  | 9261700  |
| POLA2   | 2 | 4 | 3 | 4 | 6.9603 | 12225000 | 9227100  | 9979500  | 9035100  |
| PRPF40A | 2 | 2 | 3 | 2 | 8.4378 | 12081000 | 7301400  | 12536000 | 7859500  |
| FAM120A | 4 | 3 | 3 | 3 | 12.77  | 13333000 | 9644900  | 6471400  | 10223000 |
| DPF2    | 2 | 2 | 3 | 4 | 10.45  | 17715000 | 11498000 | 0        | 10222000 |
| CLTC    | 3 | 3 | 1 | 2 | 28.066 | 16785000 | 12361000 | 0        | 10166000 |
| RPF2    | 2 | 2 | 3 | 2 | 26.333 | 5038200  | 5214000  | 19927000 | 8799700  |
| PES1    | 4 | 4 | 4 | 4 | 25.292 | 5868400  | 6875700  | 14025000 | 11613000 |
| BUB3    | 2 | 2 | 2 | 2 | 6.321  | 13992000 | 13534000 | 10748000 | 0        |
| EIF3C   | 4 | 4 | 4 | 4 | 12.846 | 9010600  | 9879300  | 9382400  | 9603700  |
| BCLAF1  | 4 | 4 | 3 | 3 | 10.878 | 14658000 | 7109900  | 8395600  | 7381600  |
| SRM     | 3 | 3 | 2 | 3 | 11.044 | 7122700  | 8625600  | 6637900  | 15139000 |

|          |   |   |   |   |        |          |          |          |          |
|----------|---|---|---|---|--------|----------|----------|----------|----------|
| SRSF4    | 3 | 3 | 3 | 3 | 8.6404 | 11158000 | 6892400  | 11421000 | 7830600  |
| THUMPD1  | 2 | 2 | 2 | 2 | 19.972 | 10992000 | 7960700  | 9256200  | 8837200  |
| ATP5J2   | 2 | 3 | 3 | 3 | 12.172 | 0        | 12231000 | 12033000 | 12747000 |
| PSMA1    | 1 | 2 | 2 | 2 | 16.89  | 0        | 12627000 | 12800000 | 11399000 |
| PRDX6    | 2 | 1 | 3 | 2 | 35.777 | 10039000 | 6848200  | 9143700  | 10232000 |
| SS18     | 2 | 2 | 2 | 2 | 10.806 | 8939600  | 7131200  | 12735000 | 7162900  |
| PSIP1    | 3 | 3 | 3 | 3 | 16.593 | 11151000 | 11827000 | 12352000 | 0        |
| HCFC1    | 1 | 2 | 2 | 2 | 40.817 | 0        | 11987000 | 11849000 | 11394000 |
| GATAD2B  | 3 | 3 | 2 | 3 | 6.7527 | 9815100  | 8477000  | 8569900  | 8203100  |
| UPF1     | 5 | 5 | 4 | 4 | 10.649 | 10094000 | 8772600  | 7366500  | 8646300  |
| SP110    | 2 | 3 | 4 | 2 | 14.092 | 8232400  | 7500100  | 9921000  | 7982200  |
| FIP1L1   | 3 | 3 | 1 | 4 | 21.926 | 13749000 | 10507000 | 0        | 9315900  |
| ODBA     | 2 | 2 | 2 | 3 | 10.569 | 8644100  | 10539000 | 5530900  | 8204100  |
| BAZ1B    | 4 | 4 | 4 | 4 | 16.316 | 8350800  | 7395100  | 9175600  | 7953900  |
| CACYBP   | 3 | 4 | 3 | 4 | 8.8423 | 10849000 | 11485000 | 0        | 9917800  |
| TAL1     | 2 | 2 | 2 | 1 | 8.0419 | 10105000 | 10225000 | 11780000 | 0        |
| HN1L     | 2 | 2 | 2 | 2 | 19.804 | 7000000  | 6895600  | 10658000 | 6874700  |
| HNRNPUL1 | 3 | 4 | 3 | 4 | 14.683 | 6917000  | 7283200  | 6721600  | 10393000 |
| PQBP1    | 2 | 2 | 2 | 1 | 4.9869 | 8775200  | 11064000 | 11383000 | 0        |
| TUBA4A   | 2 | 2 | 2 | 2 | 20.158 | 7792200  | 9530600  | 5298900  | 8161400  |
| SON      | 3 | 3 | 3 | 3 | 16.488 | 9006300  | 6635800  | 8548900  | 5672300  |
| UTP14A   | 3 | 2 | 6 | 6 | 25.306 | 4544900  | 4227700  | 14552000 | 6438700  |
| ARHGEF2  | 2 | 2 | 2 | 3 | 8.127  | 10887000 | 8366000  | 0        | 10276000 |
| MTHFD1   | 2 | 2 | 2 | 2 | 9.323  | 7106900  | 7999200  | 5789300  | 8609200  |
| STAT5A   | 2 | 3 | 3 | 3 | 5.8129 | 5508300  | 7898000  | 7734100  | 7821900  |
| SRSF1    | 2 | 2 | 2 | 2 | 9.133  | 8704800  | 7547000  | 6362900  | 6301700  |
| PPM1G    | 2 | 2 | 2 | 2 | 5.7456 | 7097800  | 7812300  | 6661000  | 7141000  |
| ZFP706   | 3 | 3 | 3 | 3 | 7.7807 | 7127800  | 7523400  | 7962400  | 6089500  |
| CAND1    | 2 | 2 | 2 | 2 | 30.403 | 8730000  | 11873000 | 0        | 7771700  |
| APEX1    | 4 | 4 | 5 | 5 | 11.204 | 7060500  | 7761300  | 5215800  | 8322300  |
| CDC73    | 3 | 3 | 3 | 4 | 8.8439 | 7283000  | 6183100  | 5273100  | 8959300  |
| ATP5B    | 2 | 2 | 2 | 2 | 11.45  | 10893000 | 5572900  | 4315300  | 6882900  |
| GRB2     | 2 | 2 | 2 | 2 | 7.6483 | 7187200  | 7454900  | 6563500  | 6359400  |
| EMAL4    | 2 | 2 | 2 | 2 | 7.9808 | 8239300  | 6271300  | 6867300  | 6056800  |
| RALY     | 4 | 3 | 3 | 3 | 7.1304 | 12353000 | 0        | 0        | 13626000 |
| BTF3L4   | 1 | 2 | 2 | 1 | 8.1846 | 0        | 8713800  | 17056000 | 0        |
| MSH6     | 4 | 5 | 4 | 4 | 11.664 | 5830200  | 6126800  | 4633300  | 9051200  |
| TCOF1    | 2 | 1 | 3 | 4 | 10.486 | 8259100  | 0        | 9828300  | 7398700  |
| IK       | 3 | 3 | 2 | 3 | 18.36  | 6176500  | 5734600  | 6207600  | 7344000  |
| H2AFV    | 2 | 2 | 2 | 2 | 7.3886 | 0        | 12677000 | 0        | 12613000 |
| GMFG     | 4 | 3 | 4 | 4 | 15.115 | 6343600  | 7293200  | 4513700  | 6687100  |
| ADRM1    | 1 | 2 | 2 | 2 | 18.865 | 0        | 6961900  | 10943000 | 6845200  |
| ACTR2    | 3 | 2 | 2 | 2 | 12.767 | 7814100  | 6647100  | 0        | 10148000 |
| FTSJ3    | 3 | 4 | 4 | 4 | 20.52  | 7303200  | 5844900  | 5605400  | 5379800  |
| DHX15    | 3 | 2 | 2 | 2 | 9.5666 | 6888600  | 9065300  | 0        | 8113100  |
| CAZA1    | 3 | 3 | 2 | 4 | 17.894 | 9356500  | 7492200  | 0        | 7053000  |

|          |   |   |   |   |        |         |         |          |          |
|----------|---|---|---|---|--------|---------|---------|----------|----------|
| CBFA2T3  | 1 | 2 | 2 | 2 | 14.09  | 8417800 | 6259700 | 4725900  | 4383600  |
| IFI3     | 3 | 3 | 3 | 2 | 23.588 | 4574700 | 5509100 | 7544000  | 6115300  |
| EWSR1    | 2 | 2 | 2 | 2 | 20.357 | 6751700 | 6736200 | 6220000  | 3770000  |
| ATP5A1   | 3 | 2 | 2 | 3 | 10.762 | 8381200 | 9394400 | 0        | 5654300  |
| VPS35    | 2 | 2 | 2 | 2 | 5.4902 | 5433400 | 5954300 | 5189900  | 6539700  |
| ZC3H11A  | 3 | 2 | 3 | 2 | 11.497 | 7355100 | 0       | 10238000 | 5049500  |
| CARM1    | 1 | 2 | 2 | 2 | 25.599 | 0       | 8360600 | 6480200  | 7559000  |
| GLYR1    | 4 | 4 | 3 | 4 | 13.244 | 4797600 | 5630500 | 5781800  | 6061000  |
| EDF1     | 2 | 2 | 1 | 2 | 24.219 | 9897400 | 5807500 | 0        | 5803800  |
| TIMELESS | 2 | 2 | 2 | 2 | 8.9968 | 6720700 | 4574800 | 5008500  | 4886000  |
| CAPZA2   | 2 | 2 | 2 | 1 | 9.26   | 7667200 | 6587700 | 6858900  | 0        |
| EIF3D    | 3 | 3 | 3 | 2 | 6.8602 | 8654500 | 6401400 | 5882400  | 0        |
| ATIC     | 2 | 3 | 2 | 3 | 10.453 | 4924800 | 5768900 | 4470700  | 5731900  |
| RCC1     | 2 | 2 | 1 | 2 | 32.793 | 7218300 | 4720700 | 0        | 8326900  |
| SURF6    | 3 | 3 | 5 | 3 | 22.416 | 3066000 | 3470000 | 9510600  | 4181800  |
| STRAP    | 2 | 2 | 2 | 2 | 2.8298 | 5315900 | 5245600 | 3239200  | 6242000  |
| FERMT3   | 3 | 3 | 3 | 3 | 10.311 | 5068500 | 5584400 | 3471500  | 5572700  |
| NIPBL    | 1 | 4 | 2 | 3 | 13.406 | 0       | 9412900 | 0        | 10210000 |
| EHMT2    | 2 | 2 | 2 | 2 | 9.8601 | 5201500 | 4041600 | 4790200  | 5509400  |
| RUNX1    | 2 | 2 | 2 | 2 | 2.8427 | 5467600 | 4550900 | 5002000  | 4384000  |
| SMARCE1  | 2 | 3 | 2 | 2 | 18.128 | 8767300 | 5186000 | 0        | 5206900  |
| RAVER1   | 2 | 2 | 2 | 2 | 9.3619 | 6787300 | 4479900 | 4567000  | 3138700  |
| SLTM     | 1 | 2 | 3 | 3 | 23.595 | 0       | 5953000 | 8414500  | 4505300  |
| SUPT6    | 2 | 2 | 2 | 2 | 9.717  | 5043100 | 3413000 | 5691600  | 4480300  |
| EIF3A    | 2 | 3 | 2 | 2 | 9.4737 | 0       | 9742900 | 0        | 8863600  |
| NUDCD2   | 2 | 3 | 2 | 3 | 5.5009 | 5468400 | 3766500 | 3954100  | 5041500  |
| CCT3     | 2 | 4 | 3 | 4 | 14.215 | 4667500 | 4911500 | 3449500  | 4802300  |
| DEK      | 2 | 1 | 2 | 2 | 5.9728 | 4834400 | 0       | 5017800  | 7701900  |
| DDX1     | 2 | 3 | 1 | 4 | 14.99  | 5743400 | 6194100 | 0        | 5610000  |
| SF3B1    | 3 | 5 | 1 | 4 | 11.177 | 4458300 | 6534600 | 0        | 6073700  |
| CDC40    | 2 | 2 | 2 | 1 | 7.4906 | 4203200 | 6170300 | 6250000  | 0        |
| POLA1    | 2 | 2 | 2 | 2 | 4.8681 | 4711300 | 3628600 | 3331200  | 4943600  |
| SF3A3    | 2 | 2 | 1 | 1 | 11.299 | 8606900 | 7706500 | 0        | 0        |
| ZMYM4    | 1 | 2 | 2 | 2 | 8.8896 | 0       | 5298500 | 5468300  | 5452700  |
| PFN1     | 3 | 3 | 3 | 3 | 8.4939 | 3118900 | 5194800 | 2210600  | 5563100  |
| LUC7L    | 2 | 2 | 2 | 2 | 5.8564 | 3249200 | 3650900 | 3764600  | 5352900  |
| ARPC3    | 2 | 3 | 2 | 3 | 7.8938 | 0       | 7424000 | 0        | 7984400  |
| EEF1G    | 1 | 2 | 2 | 2 | 19.279 | 0       | 5343900 | 4049200  | 5910400  |
| PCNP     | 3 | 3 | 3 | 3 | 3.8173 | 0       | 6158100 | 8736400  | 0        |
| TPX2     | 2 | 1 | 3 | 2 | 11.65  | 4531900 | 0       | 4752000  | 5317700  |
| CORO1B   | 1 | 2 | 1 | 2 | 5.9153 | 0       | 6947500 | 0        | 7380400  |
| SSRP1    | 2 | 3 | 1 | 2 | 5.8708 | 5482200 | 3636200 | 0        | 5176600  |
| SNRNP200 | 2 | 4 | 3 | 4 | 14.096 | 5475100 | 4326200 | 0        | 4426900  |
| RBM17    | 1 | 2 | 2 | 2 | 23.731 | 0       | 4072400 | 4275500  | 5768100  |
| SBNO1    | 2 | 2 | 2 | 2 | 3.3114 | 4728000 | 4307900 | 0        | 5031000  |
| MOB1A    | 2 | 1 | 2 | 1 | 5.9842 | 6642300 | 0       | 7308700  | 0        |

|          |   |   |   |   |        |         |         |         |         |
|----------|---|---|---|---|--------|---------|---------|---------|---------|
| CDCA5    | 2 | 2 | 3 | 3 | 14.927 | 4207600 | 3482000 | 2855600 | 3398300 |
| NCOA5    | 1 | 2 | 2 | 2 | 12.33  | 0       | 4462500 | 4295400 | 5183200 |
| CCT7     | 2 | 2 | 1 | 2 | 7.8041 | 4811300 | 4907700 | 0       | 4175100 |
| DNMT1    | 3 | 3 | 4 | 4 | 4.8695 | 3957800 | 4057500 | 3355200 | 2464300 |
| GTF2B    | 3 | 2 | 3 | 2 | 3.6347 | 4981000 | 4466400 | 0       | 4232700 |
| PPWD1    | 1 | 2 | 2 | 1 | 5.4548 | 0       | 5764000 | 7576100 | 0       |
| SEPHS1   | 1 | 2 | 2 | 2 | 3.5946 | 0       | 3639500 | 3761900 | 5897000 |
| ABCE1    | 2 | 2 | 1 | 2 | 6.2228 | 4013000 | 4781500 | 0       | 3769900 |
| TOMM34   | 2 | 2 | 2 | 3 | 6.8861 | 0       | 3519900 | 4977300 | 3960300 |
| INPP5D   | 2 | 2 | 1 | 2 | 2.4235 | 4864300 | 3889200 | 0       | 3539200 |
| SMARCA4  | 1 | 2 | 2 | 2 | 12.534 | 0       | 3398600 | 0       | 8625600 |
| API5     | 2 | 2 | 2 | 3 | 11.631 | 0       | 5699200 | 0       | 6277600 |
| SEC61B   | 2 | 2 | 2 | 1 | 3.8373 | 3796200 | 4284000 | 3425100 | 0       |
| EIF3K    | 2 | 2 | 2 | 2 | 5.5491 | 3960200 | 2513400 | 2458600 | 2461100 |
| MAPK1    | 2 | 2 | 2 | 1 | 6.3574 | 4964400 | 3399500 | 3024700 | 0       |
| USP10    | 2 | 2 | 1 | 2 | 12.316 | 4924300 | 0       | 0       | 6200600 |
| WTAP     | 1 | 2 | 3 | 3 | 8.7927 | 0       | 2574900 | 5365400 | 2864200 |
| ERG      | 2 | 2 | 2 | 1 | 8.1984 | 5950100 | 4811200 | 3960300 | 0       |
| RBM27    | 2 | 2 | 1 | 2 | 2.4361 | 3473400 | 2883500 | 0       | 4169400 |
| GNL2     | 2 | 2 | 2 | 3 | 11.805 | 2260300 | 2211800 | 3421000 | 2605800 |
| ACTR3    | 3 | 3 | 1 | 2 | 12.046 | 5123300 | 5197100 | 0       | 0       |
| EIF5B    | 1 | 2 | 2 | 2 | 4.4406 | 0       | 4253300 | 0       | 6014700 |
| PGLS     | 2 | 2 | 2 | 2 | 4.818  | 2763600 | 2708900 | 2000000 | 2793900 |
| SAFB     | 2 | 1 | 3 | 3 | 12.746 | 0       | 0       | 5146200 | 4716600 |
| PDCD2    | 1 | 2 | 2 | 2 | 10.071 | 0       | 2877900 | 3550100 | 3407400 |
| CCAR1    | 3 | 2 | 1 | 1 | 9.5388 | 4822500 | 4505900 | 0       | 0       |
| ATAD3A   | 1 | 2 | 1 | 2 | 13.007 | 0       | 3811700 | 0       | 5029300 |
| EHMT1    | 2 | 1 | 2 | 2 | 2.0624 | 4642900 | 0       | 4097900 | 0       |
| PRPF31   | 1 | 2 | 2 | 2 | 8.6185 | 0       | 2477500 | 2922600 | 3337800 |
| PGAM1    | 1 | 2 | 2 | 2 | 4.9112 | 0       | 4369000 | 0       | 4105800 |
| MRPS5    | 1 | 1 | 2 | 2 | 5.5503 | 0       | 0       | 4048800 | 4197300 |
| PININ    | 2 | 1 | 2 | 2 | 5.6792 | 0       | 0       | 0       | 8161200 |
| RANGAP1  | 1 | 2 | 2 | 1 | 21.965 | 0       | 3887500 | 4162500 | 0       |
| EBNA1BP2 | 2 | 2 | 1 | 2 | 8.6452 | 3141200 | 0       | 0       | 4838600 |
| CHMP4B   | 1 | 2 | 2 | 1 | 6.9487 | 0       | 3858900 | 3757000 | 0       |
| UTP20    | 2 | 1 | 2 | 2 | 6.483  | 0       | 0       | 4863900 | 2605300 |
| GPX1     | 1 | 2 | 2 | 1 | 5.6122 | 0       | 0       | 7430800 | 0       |
| EIF2S1   | 2 | 1 | 2 | 1 | 4.1846 | 4000300 | 0       | 3304600 | 0       |
| TBL3     | 1 | 2 | 2 | 2 | 8.0155 | 0       | 2389500 | 2738400 | 2169600 |
| SLU7     | 2 | 1 | 2 | 2 | 9.9771 | 3398600 | 0       | 1969200 | 1685600 |
| METTL1   | 2 | 2 | 2 | 2 | 2.3332 | 1735600 | 1304500 | 2120100 | 1598700 |
| HNRNPUL2 | 1 | 2 | 1 | 2 | 10.225 | 0       | 0       | 3097600 | 3488900 |
| MBD3     | 1 | 2 | 1 | 2 | 3.4622 | 0       | 3539200 | 0       | 2966300 |
| RBM7     | 2 | 1 | 2 | 2 | 5.5325 | 6444500 | 0       | 0       | 0       |
| PIN4     | 2 | 2 | 2 | 2 | 3.3276 | 6430200 | 0       | 0       | 0       |
| VASP     | 1 | 2 | 1 | 2 | 5.5268 | 0       | 3302700 | 0       | 3082200 |

|        |   |   |   |   |        |         |         |         |         |
|--------|---|---|---|---|--------|---------|---------|---------|---------|
| SUPT5  | 1 | 2 | 1 | 2 | 8.2113 | 0       | 2831400 | 0       | 3544000 |
| RPA1   | 1 | 2 | 2 | 3 | 5.2017 | 0       | 0       | 0       | 5828200 |
| DDX19A | 2 | 2 | 1 | 2 | 6.7585 | 2659100 | 2685200 | 0       | 0       |
| NSUN2  | 3 | 1 | 1 | 2 | 4.6193 | 0       | 0       | 0       | 4913500 |
| PTPN6  | 1 | 2 | 2 | 1 | 3.5284 | 0       | 2408500 | 2326500 | 0       |
| DDX52  | 1 | 1 | 2 | 2 | 11.628 | 0       | 0       | 2432700 | 1946300 |
| ESCO2  | 3 | 3 | 1 | 2 | 8.8267 | 0       | 0       | 0       | 3661400 |
| RFC1   | 2 | 1 | 2 | 1 | 5.8929 | 0       | 0       | 2401900 | 0       |
| KLF13  | 3 | 2 | 2 | 3 | 10.762 | 6394400 | 0       | 0       | 5154300 |
| YY1    | 2 | 3 | 2 | 2 | 14.927 | 0       | 9510600 | 0       | 3639500 |

**Table S3: Related to Figure 4 - Overrepresentation PC1-specific analysis to demonstrate erythroid differentiation specificity**

| p-value            | q-value     | pathway                                                                 | source       |
|--------------------|-------------|-------------------------------------------------------------------------|--------------|
| <b>2.31E-07</b>    | 3.17E-05    | hemoglobins chaperone                                                   | BioCarta     |
| <b>2.24E-06</b>    | 0.000153136 | Hematopoietic Stem Cell Differentiation                                 | Wikipathways |
| <b>6.60E-06</b>    | 0.000226049 | heme biosynthesis                                                       | HumanCyc     |
| <b>6.60E-06</b>    | 0.000226049 | Heme Biosynthesis                                                       | Wikipathways |
| <b>1.29E-05</b>    | 0.000350508 | Heme biosynthesis                                                       | Reactome     |
| <b>1.54E-05</b>    | 0.000350508 | Transcriptional misregulation in cancer - Homo sapiens (human)          | KEGG         |
| <b>2.70E-05</b>    | 0.000463082 | Ferroptosis - Homo sapiens (human)                                      | KEGG         |
| <b>2.70E-05</b>    | 0.000463082 | Ferroptosis                                                             | Wikipathways |
| <b>7.38E-05</b>    | 0.001123376 | Metabolism of porphyrins                                                | Reactome     |
| <b>0.000187498</b> | 0.002568719 | tetrapyrrole biosynthesis                                               | HumanCyc     |
| <b>0.000329785</b> | 0.004107327 | Activation of Matrix Metalloproteinases                                 | Reactome     |
| <b>0.000391528</b> | 0.004469944 | Porphyrin metabolism                                                    | INOH         |
| <b>0.000667413</b> | 0.007033511 | Erythrocytes take up oxygen and release carbon dioxide                  | Reactome     |
| <b>0.000813954</b> | 0.007965123 | Porphyrin and chlorophyll metabolism - Homo sapiens (human)             | KEGG         |
| <b>0.001213284</b> | 0.010882721 | Iron metabolism in placenta                                             | Wikipathways |
| <b>0.001278231</b> | 0.010882721 | Malaria - Homo sapiens (human)                                          | KEGG         |
| <b>0.001429847</b> | 0.010882721 | Erythrocytes take up carbon dioxide and release oxygen                  | Reactome     |
| <b>0.001429847</b> | 0.010882721 | O2/CO2 exchange in erythrocytes                                         | Reactome     |
| <b>0.001786609</b> | 0.010925639 | Copper homeostasis                                                      | Wikipathways |
| <b>0.001913981</b> | 0.010925639 | Hereditary Coproporphyrinuria (HCP)                                     | SMPDB        |
| <b>0.001913981</b> | 0.010925639 | Porphyria Variegata (PV)                                                | SMPDB        |
| <b>0.001913981</b> | 0.010925639 | Congenital Erythropoietic Porphyria (CEP) or Gunther Disease            | SMPDB        |
| <b>0.001913981</b> | 0.010925639 | Acute Intermittent Porphyria                                            | SMPDB        |
| <b>0.001913981</b> | 0.010925639 | Porphyrin Metabolism                                                    | SMPDB        |
| <b>0.002181256</b> | 0.011953285 | ID signaling pathway                                                    | Wikipathways |
| <b>0.002465142</b> | 0.012508315 | ACE Inhibitor Pathway                                                   | Wikipathways |
| <b>0.002465142</b> | 0.012508315 | Metabolism of Angiotensinogen to Angiotensins                           | Reactome     |
| <b>0.002579494</b> | 0.012621097 | Adipogenesis                                                            | Wikipathways |
| <b>0.003082163</b> | 0.014075209 | Hematopoietic Stem Cell Gene Regulation by GABP alpha-beta Complex      | Wikipathways |
| <b>0.003082163</b> | 0.014075209 | prion pathway                                                           | BioCarta     |
| <b>0.003415008</b> | 0.014620504 | ACE Inhibitor Pathway, Pharmacodynamics                                 | PharmGKB     |
| <b>0.003415008</b> | 0.014620504 | Agents Acting on the Renin-Angiotensin System Pathway, Pharmacodynamics | PharmGKB     |
| <b>0.003853395</b> | 0.015997427 | p53 signaling pathway - Homo sapiens (human)                            | KEGG         |
| <b>0.004240205</b> | 0.017085532 | SLC-mediated transmembrane transport                                    | Reactome     |
| <b>0.004509175</b> | 0.017650198 | Renin-angiotensin system - Homo sapiens (human)                         | KEGG         |
| <b>0.005743831</b> | 0.021267698 | Basigin interactions                                                    | Reactome     |
| <b>0.005743831</b> | 0.021267698 | ID                                                                      | NetPath      |
| <b>0.006130637</b> | 0.022102559 | TGF-beta signaling pathway - Homo sapiens                               | KEGG         |



---

(human)

|                    |             |                                                   |              |
|--------------------|-------------|---------------------------------------------------|--------------|
| <b>0.008034209</b> | 0.028222735 | Transport of small molecules                      | Reactome     |
| <b>0.008573078</b> | 0.028802499 | Hematopoietic cell lineage - Homo sapiens (human) | KEGG         |
| <b>0.008619726</b> | 0.028802499 | Development and heterogeneity of the ILC family   | Wikipathways |
| <b>0.009193396</b> | 0.029987983 | Extracellular matrix organization                 | Reactome     |
| <b>0.009694874</b> | 0.030888318 | Porphyrim metabolism                              | EHMN         |

## Supplemental figure legends

### Figure S1

A. Box plots with 10-90 percentiles of Stag2, Smc3, Smc1a and Stag1 expression in the indicated populations. Erythroid and Myeloid progenitors were empirically considered as all cells with normalized expression of Klf1 > 10 and Spi1 > 10, respectively.

B. Schematic representation of the defining criteria for cis-regulatory element classification.

C. Density heat map of Rad21, Ctfc, Pol2 and the chromatin marks H3K4me3, H3K27ac and H3K4me1. Peak classification was defined based on the Figure S1B schema.

D,G. Plots of normalized Smc1 and Ctfc binding ratio ( $\text{Smc1\_in\_erythroid}/\text{Smc1\_in\_HPC}$  and  $\text{Smc1\_in\_myeloid}/\text{Smc1\_in\_HPC}$  for (D),  $\text{Ctfc\_in\_erythroid}/\text{Ctfc\_in\_HPC}$  and  $\text{Ctfc\_in\_myeloid}/\text{Ctfc\_in\_HPC}$  for (G)) at Cohesin-associated active enhancers, active promoters and insulators/others in the HPC, erythroid and myeloid cellular stages. Shown are means with SD of replicated experiments.

E,H. Total count of significant differentially bound Smc1 (E) and Ctfc (H) peaks in the HPC to Erythroid differentiation (upper panels for each figure) and the HPC to myeloid differentiation (lower panels - missing for Smc1 because no peak reached the threshold of significance). Left panels show pie charts of genomic location of differential bound peaks. Scatter plots (right) - representation of the differential Smc1 (E) and Ctfc (H) binding at active promoters and enhancers in the indicated populations. Blue dots (Lost) show peaks that decrease, while red/purple dots (Gained for erythroid and myeloid respectively) show peaks that increase during the specified differentiation.

F. Immunoblotting of Stag2, Rad21 and Actin protein expression in HPC, Erythroid and Myeloid cells.

### Figure S2

A. Normalized enrichment scores (NES) for the top 5 hematopoiesis-related datasets that differed between Erythroid and Immature genes, as determined by GSEA. FDRq values were  $< 0.001$  in all datasets. Input was a ranked list of all  $p_{adj} < 0.1$  genes from Figure 2F.

B. Average profiles of Rad21 and H3K27ac binding at promoters of erythroid (red lines) and immature (blue lines) genes.

C. Box plots and 10-90 percentiles of the differences between significant interactions of baits at promoter regions of erythroid genes (red) and immature genes (blue) in the Erythroid and HPC cellular states. Interactions were outputted with the CHICAGO pipeline. The threshold for significance was set at 5.

#### Figure S3

Spring viewer plot displaying scRNASeq expression of Etv6 during the murine hematopoiesis. Minimum value = black, maximum value = neon green.

#### Figure S4

A. Inducible knockdown of the indicated Cohesin members in HPC after 72 hours of Dox-induction. Shown are 4 experimental replicates for each KD clone, with the exception of shR21\_3, where experiments were only repeated 3 times. Comparison and calculation of degree of knockdown internally was made with 4 experimental replicates of three different Luc clones.

B. Immunoblotting of the indicated proteins demonstrates KD efficiency.

C. Similar to Figure 4B, plots of normalized protein binding ratios at the indicated genomic regions. Ratio was performed as  $\text{shCohesin}_{\text{HPC}}/\text{Luc}_{\text{HPC}}$ . To minimize global quantitative biases, the binding signal was CPM normalized and internally calibrated to the signal at insulators/other sites (see Materials and methods). Shown are means of replicated biological experiments.

D. Similarly to Figure 4C, differential gene expression between Luc\_HPC and shR21\_HPC, and Luc\_HPC and shS1a\_HPC. The blue shaded area consists of genes enriched in HPC, while the grey shaded area shows genes significantly expressed in shCohesins\_HPC. The numbers at the upper corners show the counts of  $\log_2FC > 0.5$ ,  $p_{adj} < 0.1$  and ( $\log_2FC > 1$ ,  $p_{adj} < 0.05$ ) significant differential genes. The significance and difference spreads were set intentionally to match those in Figure 4F.

E. NES for significant hematopoiesis-related datasets that were generated by GSEA. Input was a ranked list of all  $p_{adj} < 0.1$  genes from the corresponding Figures 4C and S4D datasets.

F. Counts of CD71, CD71/Ter-119 and Ter-119 positive cells in the indicated cell lines after 6 days of EPO induction.

G. Representative flow cytometric analysis of myeloid differentiation following IL-3 for Luc\_Myelo and shS2\_Myelo at the indicated times.

H. Counts of CD11b, CD11b/CD14 and CD14 positive cells in the indicated cell lines after 6 days of IL-3 induction.

#### Figure S5

A. Differential binding of Rad21 at Tier1 promoters in Luc-Ery and shS2-Ery cells was displayed in a waterfall plot to visualize the high variability of the binding differences between the 2 groups.

B. and C. “Lost” promoter regions from Figure 5D (enriched in Luc\_ery, lost in shS2\_ery) were annotated with the GREAT platform. Shown are  $-\log_{10}$  binomial FDR q-values for the 10 most significant terms of the GO biological processes (B) and MGI phenotype (C) enrichments.

D. - F. Plots of - D. - differential genes in Luc\_ery and shS2\_ery cells, - E. - H3K27ac at the promoters of differential genes, - F. - interaction frequency of promoters of differential genes – all correlated with Rad21 binding at the corresponding regions. All values are means from replicate biological experiments.

G. Example of Rad21 and H3K27ac dynamics binding, as well as interaction frequencies between Luc\_ery and shS2\_ery at the Gata1 promoter (RNASeq  $\log_2\text{foldChange} -1.7$ ).

## Figure S6

- A. Only modest overlap is demonstrated between erythroid differentiation Tier 1 and perturbation Tier A (left panel) and the erythroid differentiation Tier 4 and perturbation Tier D (right panel).
- B. Gene expression analysis of *Etv6* after 3 and 5 days of Dox-induction in the indicated isogenic cells.
- C. Gene expression analysis of *Etv6*, recording the KD efficiency 2 days after transduction in the indicated isogenic cells (also see Materials and methods).
- D. Longitudinal testing of cell viability of Dox-induced Luc-HPC and shS2-HPC cells after transduction with control Scr or *Etv6*-directed short hairpins. Shown are results from three independent experiments.

## Figure S7

- A. Gene expression differences between STAG2mut and other MDS subtypes for Luc\_Ery-enriched genes from Figure 4F. Genes that were enriched in other MDS subtypes are marked with shades of red, while genes that were enriched in STAG2mut MDS were marked with shades of blue. Specific genes of interest are shown to the right.
- B. Similar analysis in AML. Gene expression differences between Cohesin mutated (18 samples) and other AML subtypes (133 samples) from the TCGA LAML dataset for Luc\_Ery-enriched genes from Figure 4F. Genes that were enriched in other AML subtypes are marked with shades of red, while genes that were enriched in Cohesin mutated AML were marked with shades of blue. Differential gene expression and FDRq values were computed with DESeq2 (citation). Specific genes of interest are shown to the right.
- C. and D. Differences in expression between normal bone marrow, other MDS and STAG2mut MDS CD34+ cells (C) or other AML and Cohesin mutated AML (D) specifically at the alpha- and beta- globin genes.

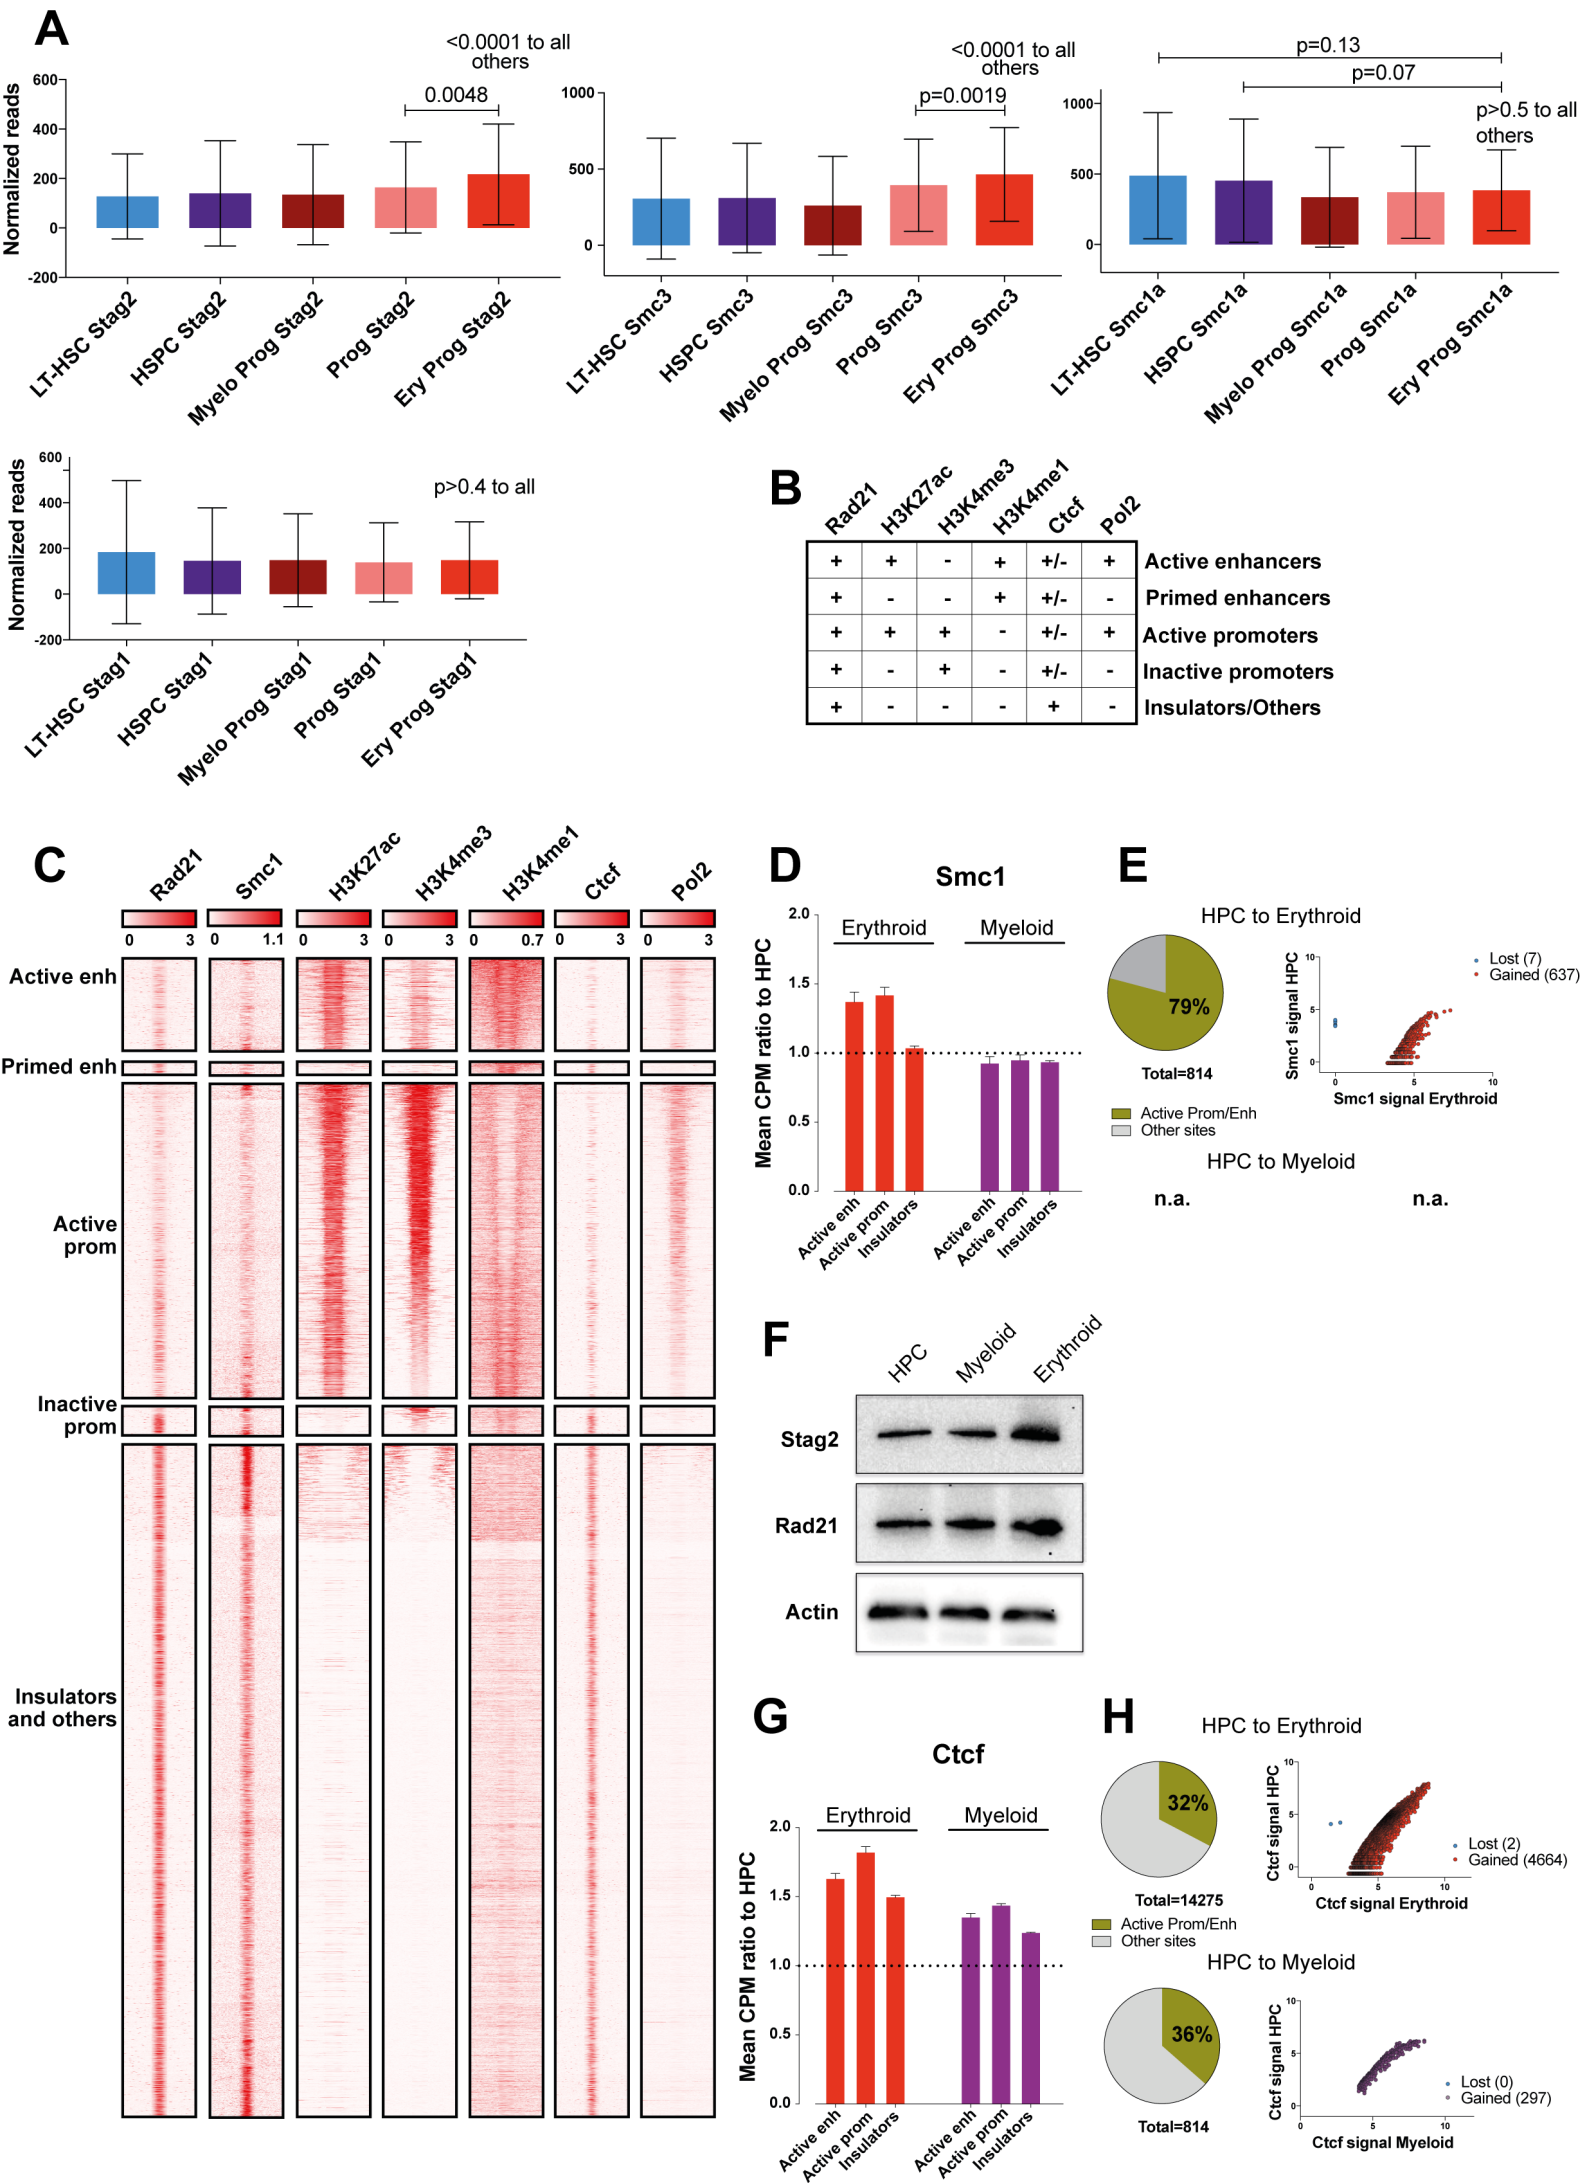

**Figure S1**

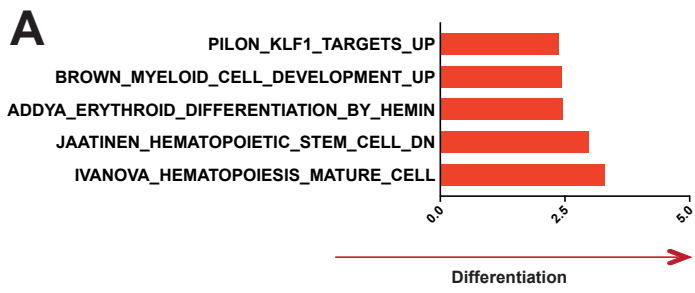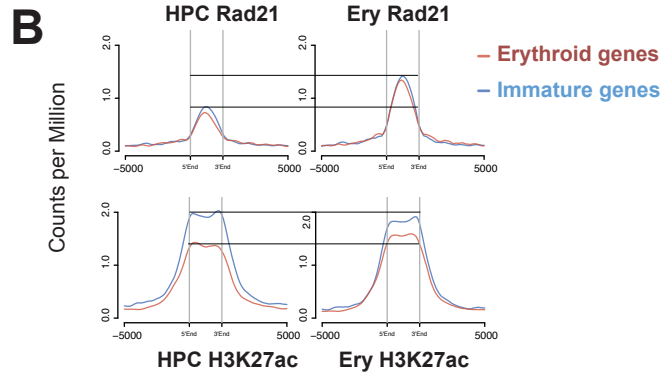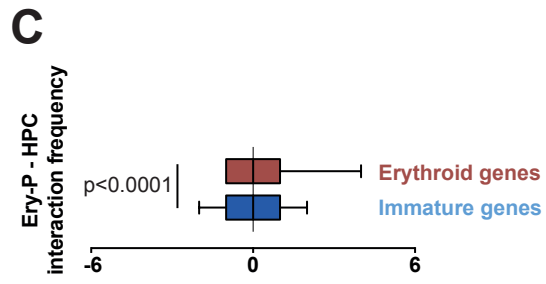

Figure S2

Etv6 expression

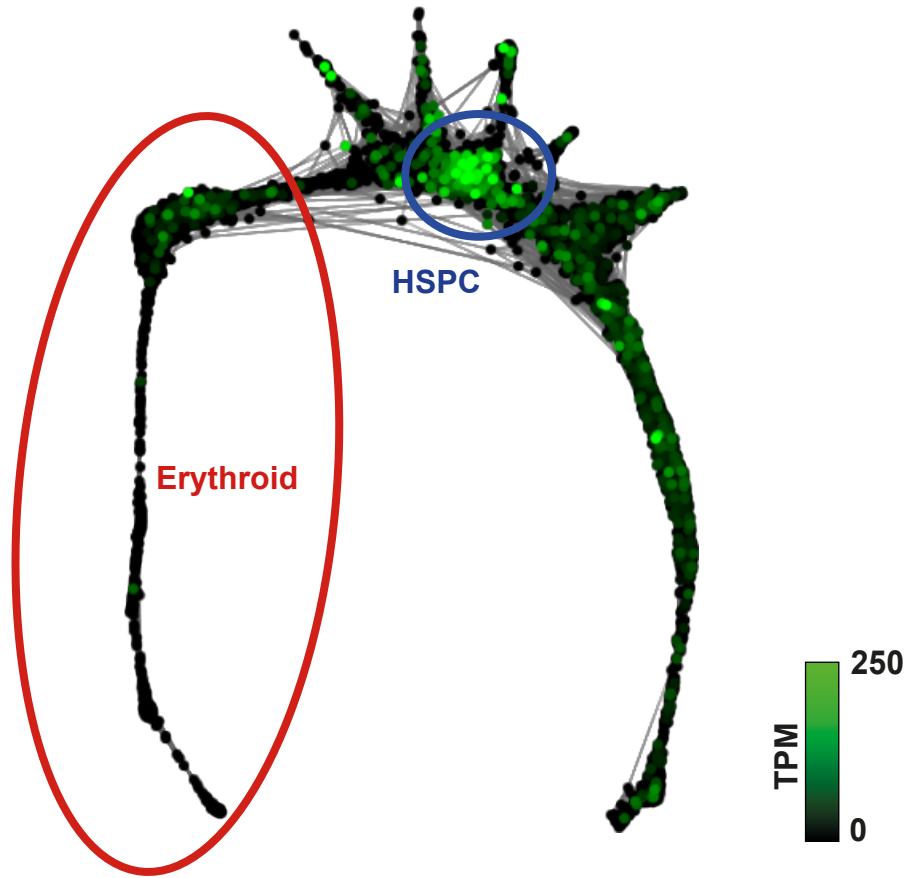

Figure S3



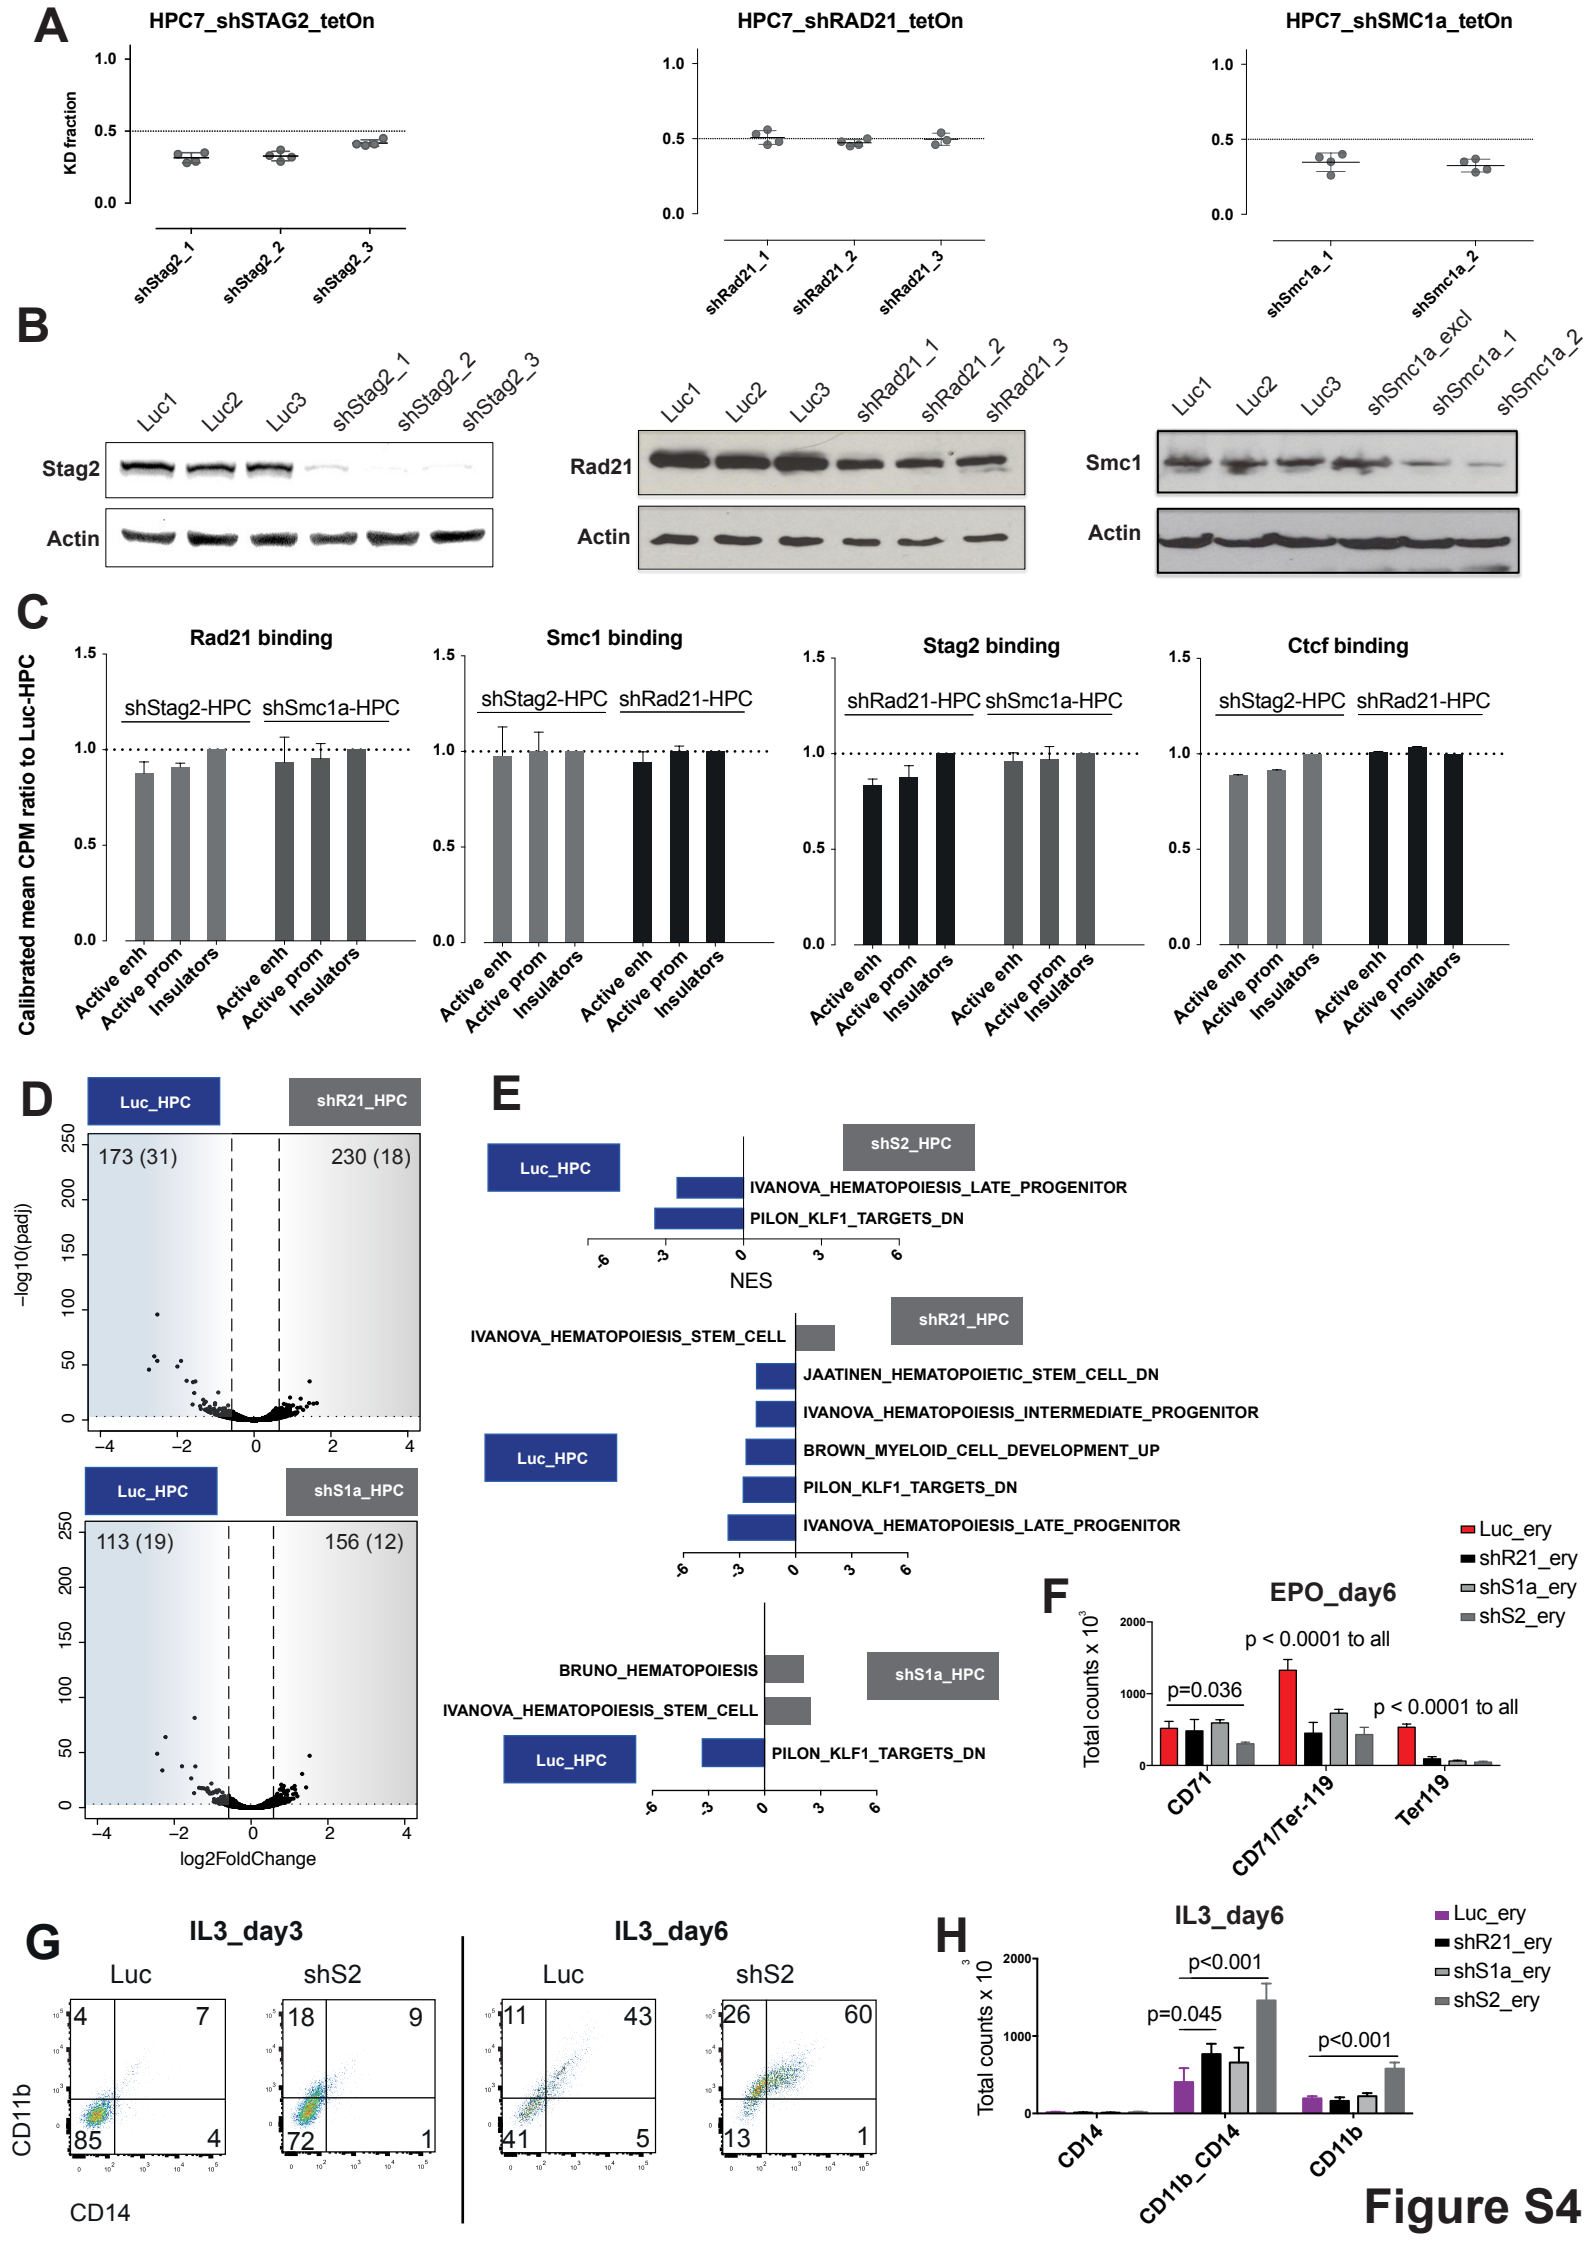

**Figure S4**

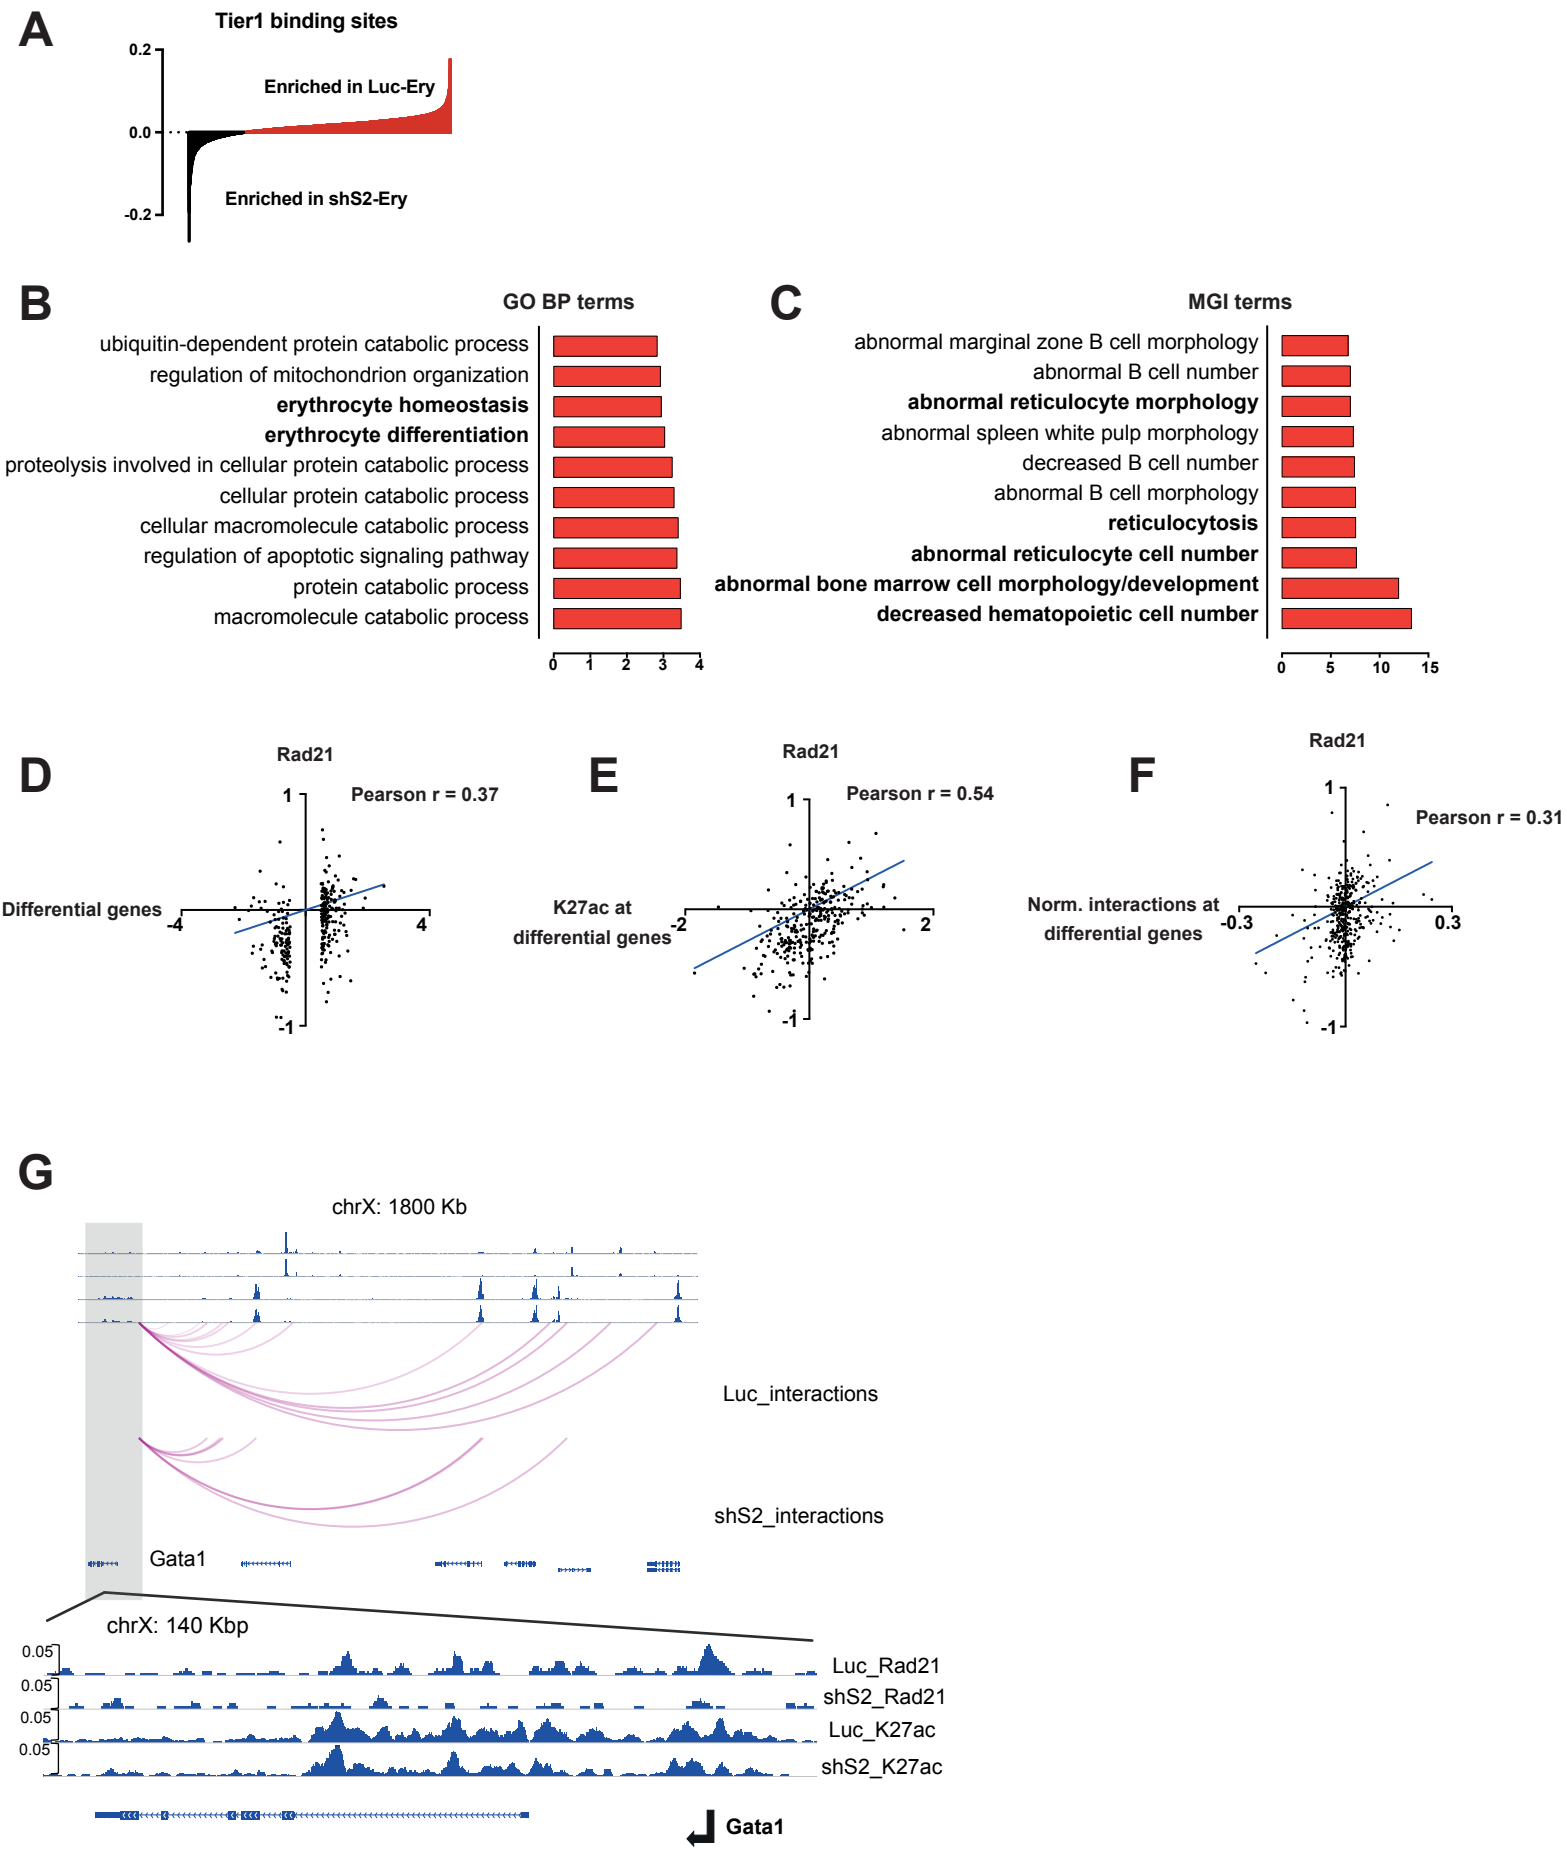

Figure S5

**A**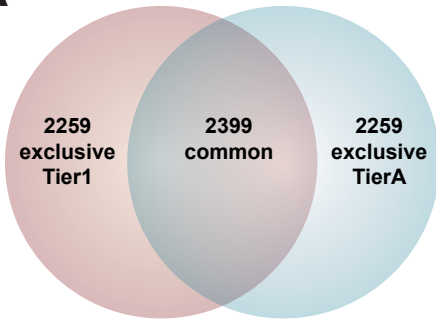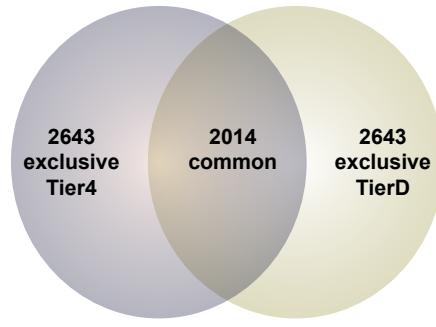**B**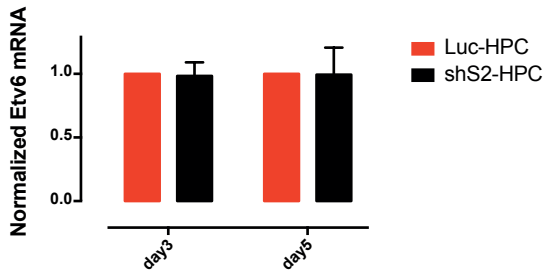**C**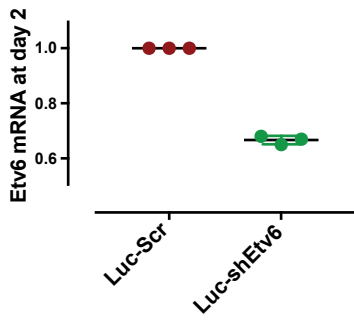**D**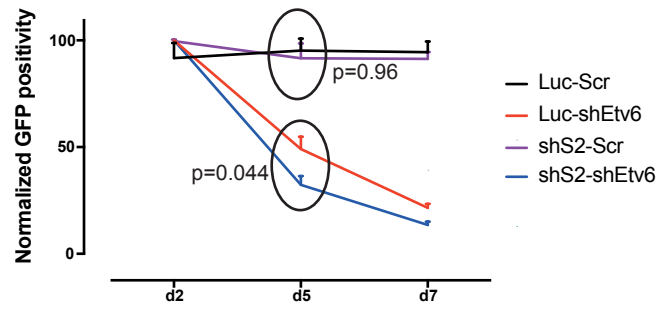

**A**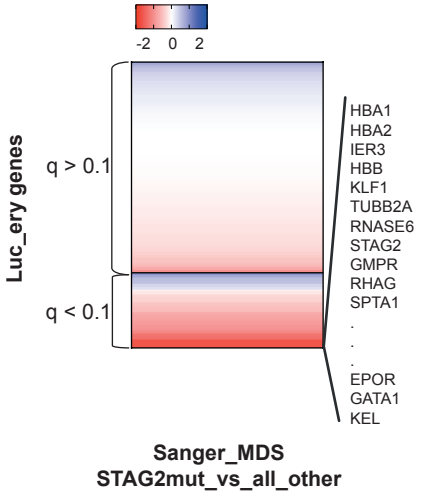**B**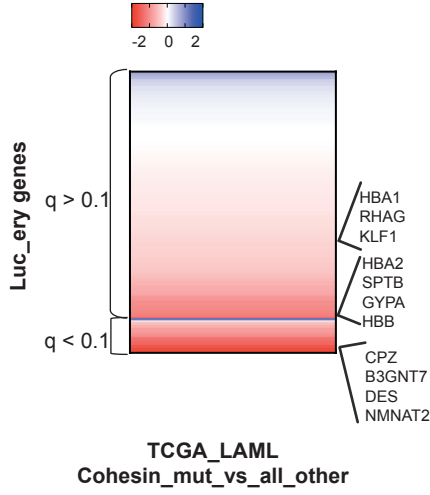**C**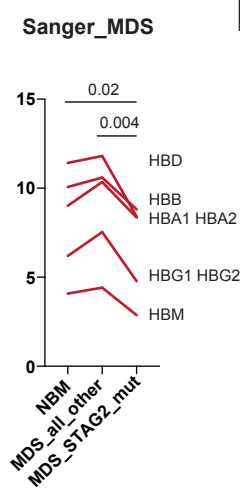**D**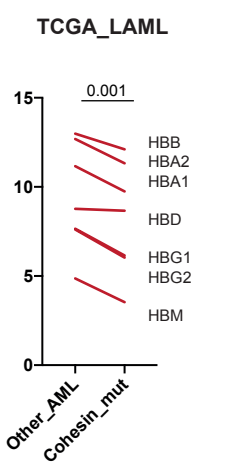

Supplement: bloodBLD2019001553-suppl1.pdf [file bloodBLD2019001553-suppl1.pdf]
